# Supplementary material for: Foveal Pit Morphology Characterization: A Quantitative Analysis of the Key Methodological Steps
Source: Entropy (Basel). 2021 Jun 1;23(6):699. doi: 10.3390/e23060699 (PMC8227188; doi:10.3390/e23060699)
Supplement: Supplementary file 1 [file entropy-23-00699-s001.zip]

Archive with 4 entries (4 files):
- code.zip
- results_1.csv
- results_2.csv
- supplementary_figures.pdf
