# Supplementary material for: Foveal Pit Morphology Characterization: A Quantitative Analysis of the Key Methodological Steps
Source: Entropy (Basel). 2021 Jun 1;23(6):699. doi: 10.3390/e23060699 (PMC8227188; doi:10.3390/e23060699)
Supplement: Supplementary file 1 [file entropy-23-00699-s001.zip › results_1.csv]

subject	none	min	resample_min	smooth_min
cVG07	4.65627170352684	4.81740633884315	4.66443955715172	4.30686525172226
cVG13	6.98979751664003	5.9976427928223	3.97177300493468	4.32868544581338
cVG14	11.46676342464	7.03707921830182	6.25699969294992	3.37187788244902
cVG16	4.9051544789261	7.70644336016354	4.3162229813607	3.3971706255992
cVG18	6.92742074954342	4.86174979540673	3.94378938838671	3.94378938838671
cVG19	5.71674520024995	5.33914805721795	3.69350927045888	3.8983017817587
cVG21	5.58843735784619	5.02554535278607	3.76618570561728	3.589866521775
E31	5.01333516207106	4.8971427665571	4.19028111302826	3.56839578992871
E32	6.40016945637423	5.06345548624104	4.90071668572174	4.63528001324142
E33	7.94904730628914	3.19047117515007	3.32465072647894	3.1641628333754
E34	4.84491058215049	4.86515050224241	4.69786577513285	4.10432561236594
E35	4.92356485765281	6.0295577763752	3.81793444562999	3.43381076703249
E36	4.59625557990432	5.43443058873951	4.12621867488377	3.69418357136962
E38	5.24816631366226	4.52387569848881	4.56283853774739	4.60141142961009
HC001AM	5.44269400377491	5.60064207199672	5.35688838555542	4.63532952531691
HC002AM	6.99457295649796	3.92020621353148	3.96963495914833	3.99097260007015
HC004AM	4.62200200059897	4.90895089186227	5.68623082828245	3.40662515897018
HC006AM	5.87392434593495	3.82804102953428	3.9104302287981	4.03060308122492
HC016AM	12.4134053618657	4.50249087903249	4.00304687173658	3.65668636236473
HC017AM	8.04884450461115	4.39323120049095	4.34880423795988	4.10966261282262
HC020AM	3.37465379650069	3.2880298056656	3.51956599877058	3.25545978416944
HC021AM	5.42974159261758	6.31776077154826	5.04427603677885	4.67990765055477
HC022AM	5.19657021482498	4.9880551175156	3.47146650298904	3.58267907439423
HC023AM	6.43191582227137	3.44076707919858	3.34756782386579	2.83910862459487
HC024AM	4.22603536027312	3.51580874121626	3.55810874013006	3.7618219312403
HC025AM	6.26745802325303	4.6816150899671	4.41747951513397	3.80885213299771
HC026AM	8.86655325927859	6.47223999421468	5.0059502311838	4.22868196806275
HC027AM	4.0661084954481	4.35090207411384	7.1740751357804	4.57221337003528
HC028AM	5.04257085418222	5.77420538901075	4.92758520794601	3.88012546680144
HC029AM	7.1807112758055	5.04882434525351	3.10422084653082	2.79381580648336
HC030AM	4.95756079280012	3.81309341954894	3.57082428860692	3.45627280896798
HC031AM	4.41197544828691	5.10947672911134	4.89711665786569	4.33408829661563
HC032AM	5.17668272190611	5.69785387713339	3.76242063389301	3.78243347535854
HC033AM	4.70943777049021	4.37139910110199	3.73424058052649	3.48744146291151
HC034AM	3.95734469015393	4.75430994740767	3.9811111861842	3.58203420656613
HC035AM	14.4332764204968	4.84823048339682	5.84227492981884	4.90609255776449
HC036AM	5.31602517882003	4.58091459562474	5.16752391987454	4.29665891635817
HC037AM	17.6424087644092	8.12628563189684	5.21315065335849	3.6800742501308
HC038AM	8.85794061681052	8.56559406797678	6.68581864975357	4.81317281402069
HC039AM	7.13552532049261	4.90879809705098	4.03217689647034	4.02353411719015
HC040AM	3.31387382153395	4.3160819463866	4.5344201634713	3.46714966672349
HC041AM	7.29841058946296	4.76638897720224	5.14915549640832	4.68446881262983
HC042AM	7.86583362988555	5.65487747710442	4.77731198325452	3.31969192989976
HC043AM	6.33313925224527	3.89226337772954	4.16532763307368	3.81114481422431
HC046AM	4.7664929444684	7.07664528204281	4.87549232545868	3.50684375125493
HC047AM	5.1767450795611	4.50626503910434	4.51453542892341	4.14859677206456
HC048AM	4.77628891773304	4.46826788649916	5.14597133410903	3.78173773416644
HC049AM	4.63634456008799	5.02134550868378	4.32247777366173	3.30161803313029
HC050AM	5.55909842047698	6.55800722107479	5.61329936732255	4.67208917940298
HC051AM	4.25707242506081	5.22174348610725	5.08987915740226	4.64867207601036
HC053AM	4.57814049388285	4.74460743502521	4.90804262597897	4.08638770858389
HC054AM	8.83791519279427	5.69389820926715	4.86620124569508	4.33639614043042
HC055AM	5.91619786075208	4.38200157948301	4.30760063117533	4.03965140564531
HC056AM	7.34184107631256	6.43909555690312	5.61850147207736	5.48977182667059
HC059AM	4.18772730630792	3.74660165622193	3.66970468489783	3.82053211271637
HC060AM	11.5083087801234	5.83816439236315	5.03942158668942	3.85660651692764
HC062AM	5.63346635087118	5.81679320410728	5.82254005346161	4.01219330421183
HC063AM	9.48111657374062	4.13307276442657	4.18753787815335	4.1186735508177
HC064AM	5.49000828196134	5.10240404190643	4.53813333235727	3.93865752255068
HC066AM	4.49625854696713	4.1297679390563	4.30308600620523	3.90804166920792
HC067AM	5.13386277582278	4.79882797755546	4.44414885385963	4.31622512652652
HC068AM	8.21621770180729	7.17943345211332	5.35593605456457	4.59074276121422
HC069AM	5.1535753689721	6.01345420937827	6.25768988693711	3.12101070711621
HC071AM	8.61575091959185	5.96116238248112	5.82054779921463	5.34605938386725
HC074AM	6.50294578410574	4.14159139455804	3.966344773862	3.86020516564696
HC076AM	5.00315710140256	3.32485716308344	3.05350215932069	2.96670680105759
HC081AM	5.65729559359575	6.00513346007184	6.5808914603629	4.93646667994436
HC083AM	5.08243490288476	5.64793619834127	4.59333209366617	4.33053858376156
HC087AM	7.46487597162893	4.19557679450937	3.84462796819304	3.11420360236371
HC089AM	4.15374982105576	3.94810631168644	3.98001669117651	3.38116195316147
HC090AM	3.49082248474389	3.99952170162744	5.17998680462498	3.37001197099842
HC092AM	10.2402053548516	4.77096674592339	4.93277532040776	4.59855633571355
HC093AM	4.19419561895433	3.98724036481839	4.08903282569004	3.75807074917737
HC097AM	6.02371435110609	3.27043425151883	3.22903515914706	3.20436023446268
HC098AM	5.49443495845594	5.38453742845868	5.68121807726749	4.57647275350191
HC099AM	6.57194315381954	6.28794584811737	5.04612474945988	4.52130613576718
HC100AM	9.23092114177762	12.5251563134997	11.4217677354642	3.63241443306318
HC101AM	4.13607592023474	3.73873035503085	4.06570467097495	3.7955484152762
HC102AM	4.56783604964455	5.0293651616724	3.87987739853521	3.70697981611127
HC104AM	5.87707558470139	4.77791347682223	4.32502255916235	4.09495233455536
HC106AM	6.29225524199655	7.94442094678521	4.94227768353528	3.24237592418977
HC108AM	18.7066575742332	6.33586989648492	5.52686764388073	4.47329523091961
HC111AM	3.58748525937195	3.88277314980579	4.17588567836508	3.48470872466669
HC112AM	4.49398246011418	8.08542399437193	6.06091224173123	4.48347792547485
HC113AM	3.93451233818166	4.15978547055125	3.95741386931085	3.95741386931085
HC116AM	5.01101050141913	3.50864774511146	4.54247093095472	3.36718841393691
HC119AM	5.54232324954157	4.75225269437979	4.15202637622424	3.61283794375613
HC120AM	7.49210724836411	6.32215403827131	4.92888526138348	4.81707144303186
HC121AM	5.30505935936835	3.96568239322376	4.85617134797035	4.02797194733315
HC122AM	7.07905486417407	7.16515767934728	8.00467853312587	5.40606312172187
HC123AM	6.50111642885919	3.84967166042857	3.67999731217845	3.68395752362928
HC124AM	5.27269320066072	7.44822254151538	4.82644780826473	4.25976822085393
HC125AM	4.88784884907101	4.70941611175312	4.47659358697383	3.99612621559683
HC126AM	3.91225449011318	4.54226762166715	4.40235432764495	3.98366510221857
HC128AM	4.44053737330125	4.79116848758548	4.93098803723182	4.44283109337646
HC130AM	5.07687114968241	4.15273482483273	3.99509172171198	3.70643893562485
HC131AM	10.9151752122661	4.63166597676451	4.70567131750744	4.31103334557968
HC133AM	6.08085542698868	5.88838512200382	6.92714831820374	5.28934078835332
HC134AM	5.98664790502753	4.39231679709937	4.62351180315069	4.46611685532008
HC137AM	4.77303578461487	6.35483259998996	4.33969717480125	3.70716372348415
HC138AM	4.6594635428963	4.17844373837914	4.39436034872254	4.1476986522643
HC139AM	4.60746583873974	4.35774887168241	4.1002926378257	3.77009527289693
HC140AM	5.69795517956293	4.03587277849616	4.73086587693412	3.88405765790826
HC141AM	4.77055500623284	4.70917463245885	5.84440414487355	4.137696455212
HC142AM	4.8659302899296	4.27590533299311	3.87477252596627	3.31091321803743
HC143AM	3.46657606822451	3.62559156157733	4.28767739804855	3.51559723666649
HC144AM	4.21899333115684	3.97651101142786	3.67889794352525	3.80002634149226
HC145AM	3.42306045834696	3.53139602950745	3.70366253042465	2.96201018002807
HC146AM	3.76997594875514	3.79432089523296	4.74871536140558	3.61904235601637
HC147AM	5.05778366220907	4.99031773104573	4.88341690194808	4.17498157755014
HC148AM	3.44824512173881	4.94239645805147	4.52515586767277	3.43643981604108
HC149AM	3.40495557860678	6.34863193088621	9.9005307670706	3.1544488596445
HC150AM	5.13751281218184	4.82984357358159	4.26455758510866	3.87945624032146
HC160AM	4.14884487475793	4.11807194493619	4.71704440640897	4.24132116443134
HC166AM	5.62738130803098	4.3434379992178	4.34284307465447	3.6588233720606
HC169AM	4.43957045592053	4.20592189096195	4.12142047942479	3.44395799161658
HC170AM	6.56247790255272	4.33844443342491	4.2835381978039	4.19196887584441
HC182AM	4.8862625293709	5.10789792406722	4.52518492001184	4.42238987512761
HC186AM	4.2078042220614	4.83884589310177	4.59551877254252	4.32209422688937
HC187AM	9.78661891838206	6.07247232547383	4.25838003383898	4.22552904389208
HC193AM	8.85030326203936	4.73781300301022	5.07041178643164	4.34476012332972
HC213AM	3.69508457766407	3.18231954426622	3.70098801186415	3.3088181306405
HC219AM	7.12492144616013	6.59372746131362	4.32068750429718	4.08527215315185
HC223AM	6.66949968285171	7.05171070748268	5.25613876642977	4.33519772831867
HC233AM	5.20809921597303	4.63804947869608	4.28984720368394	3.73357512075089
HC235ST	5.69934982619077	4.10870924029207	3.97779120019658	3.79818614949487
HC236AM	4.95666202237862	6.88623103894182	7.48333878434106	3.87501279486464
HC237AM	5.09288645442781	4.83668776151127	4.91449809697424	4.48063624144656
HC238ST	8.72716580290563	9.67457441425013	5.58830280708243	3.61279316779423
HC239AM	5.97497313099523	5.57950352526802	4.89945024561202	3.85785644201081
HC240AM	7.80856878117542	5.39466530602927	3.84619245616455	4.05993798750475
HC241ST	9.66784600633863	6.20768073073676	5.89061147329119	5.15699303684548
HC242ST	4.13455439945652	2.80959571082302	2.95925689879036	3.27420615350935
HC243ST	5.29207163313361	5.633697044185	5.65055364320499	5.136334115303
HC245AM	4.62491220129282	4.20864135871613	4.29458931699787	4.20685776630035
HC246ST	6.67918041230578	5.14157389819058	5.48379458597418	3.95701037283506
HC247ST	5.96206991214038	4.03840145193794	4.27215334570678	4.12944982349356
HC248ST	7.35750805783036	6.73396076655539	6.6066439256745	4.40901622811332
HC249ST	5.02593997766244	6.50672168238698	4.33336997834572	4.17787949412903
HC251ST	4.62347893914895	5.02717920020494	5.00872552233862	4.76586682962908
HC253ST	7.17036315099215	5.88669588991289	5.87254484977778	5.43568269123383
HC254ST	2.69248016595076	3.55679387664485	3.1644621023937	2.45278832234158
HC255ST	6.01519447358596	7.48047173297125	4.51676704987106	4.33478279536061
HC256ST	6.68917762805591	6.59763871089681	4.59846666209574	3.91743739120642
HC257ST	8.4482969259661	5.36683338887232	5.76536947029717	4.60424509837295
HC258ST	4.86052443589244	4.23221902817747	3.89028504512322	3.84115451267522
HC259ST	4.758611608053	4.99071201655234	5.00850940012162	4.6121353335311
HC260ST	4.54960066665901	4.14496141316081	3.99043815997805	3.95548406898305
HC261ST	3.31242078463385	3.09997101432554	3.04786587099131	3.1222172486368
HC262ST	11.2040228270305	6.4985078597356	6.90443215823507	5.84883916870706
HC263ST	5.58660796750141	4.9554755423127	4.7030994343413	3.78158885158781
HC264AM	6.07707000557761	6.12562856591041	6.42993071384168	6.07717874048609
HC265ST	10.3419425459479	5.36005851280354	4.40891241429121	4.58727841484953
HC266ST	6.1960594647904	4.1602791879215	4.17049375526208	3.07500266375106
HC267ST	6.58617493741152	4.52816350833895	4.24129783437619	3.98939300242916
HC268ST	7.01700257422557	5.91003580186828	5.15540552631484	5.31419263387869
HC269ST	14.9665219746771	5.36215515093763	5.21244049421578	5.79446687627177
HC270ST	6.05537237968949	4.14475390899157	3.88279324462538	3.66120227250451
HC271ST	3.67203618375636	4.82964509749832	4.01721180571727	3.57503072280366
HC272ST	7.52400617422945	4.51553465785968	4.31139513164798	4.14491952636422
HC273ST	5.88043175985159	4.44186389729236	4.41991965996007	4.39966137177859
HC274ST	5.19712698978242	4.9343079230113	4.44476949186788	4.14459911409915
HC275ST	6.73240232289664	6.30453965660042	5.1923676723599	4.982823197602
HC276ST	6.50363302252311	6.19023167103305	4.77848933010932	4.34187894356842
HC277ST	9.63601015644227	7.20176071250022	6.79085888343507	5.49991934274227
HC278ST	6.24771644680617	5.41568202030154	5.5763445626278	5.4640199562502
HC279ST	9.28390896331602	8.21461073061572	6.41656360590933	4.40857587360166
HC280ST	7.3780427529061	4.52993901550237	4.31250426868985	4.0187393482888
HC281ST	5.0486858547586	5.7755552628126	5.32656349596924	4.1201095325616
HC282ST	4.30952093639094	3.99219262154832	3.77445037009963	3.7367915376766
HC283ST	6.38277961343896	5.73754283626738	4.20513649143846	3.93737996184223
HC284ST	4.55532683493734	4.78651649427796	5.12555130027742	4.97661356497565
HC286ST	5.8757039714662	5.33672581189696	5.25514930693047	4.02809896139244
HC287ST	6.47304305562122	4.187913734391	4.05555768169115	4.16055642471674
HC288ST	5.24451169803046	8.17631965461623	5.54297105065656	5.09264410015996
HC291ST	5.82797183633784	4.15324027812946	3.48841191136378	3.55219910747535
HC294ST	7.91389327606429	5.73192065524506	5.68884045375828	4.89230146148167
HC296ST	6.78348347156528	5.78053408735616	4.98340471952514	4.48130079216388
HC297ST	8.82515561308696	5.73613392903858	4.41464320424661	4.77028712560327
HC303ST	5.82809597773846	5.66787103477041	3.86974380540869	3.96958309779044
HC304ST	6.88368587193909	6.21135040628835	4.7892597355541	3.74028216402088
HC305ST	4.19905319960191	5.61435855690887	3.83112381452091	3.33074617844409
HC308ST	4.67667291019678	6.43623547969848	7.02984818579058	3.46665772504647
HC312ST	6.3440711037649	6.12265102612769	6.27535872235171	4.07729732442155
HC313ST	6.15611946334299	5.21752890340614	4.49650653359457	3.88933589376516
