# Supplementary material for: Foveal Pit Morphology Characterization: A Quantitative Analysis of the Key Methodological Steps
Source: Entropy (Basel). 2021 Jun 1;23(6):699. doi: 10.3390/e23060699 (PMC8227188; doi:10.3390/e23060699)
Supplement: Supplementary file 1 [file entropy-23-00699-s001.zip › results_2.csv]

subject	none_raster_RMSE	none_star_RMSE	Scheibe_raster_RMSE	Scheibe_star_RMSE	Ding_raster_RMSE	Ding_star_RMSE	Yadav_raster_RMSE	Yadav_star_RMSE	Breher_raster_RMSE	Breher_star_RMSE	Dubis_raster_RMSE	Dubis_star_RMSE	Liu_raster_RMSE	Liu_star_RMSE	movAvg_5_raster_RMSE	movAvg_5_star_RMSE	movAvg_10_raster_RMSE	movAvg_10_star_RMSE	movAvg_15_raster_RMSE	movAvg_15_star_RMSE	movAvg_20_raster_RMSE	movAvg_20_star_RMSE	movAvg_25_raster_RMSE	movAvg_25_star_RMSE	movAvg_30_raster_RMSE	movAvg_30_star_RMSE	movAvg_35_raster_RMSE	movAvg_35_star_RMSE	movAvg_40_raster_RMSE	movAvg_40_star_RMSE	movAvg_45_raster_RMSE	movAvg_45_star_RMSE	movAvg_50_raster_RMSE	movAvg_50_star_RMSE	movAvg_55_raster_RMSE	movAvg_55_star_RMSE	movAvg_60_raster_RMSE	movAvg_60_star_RMSE	loess_1_raster_RMSE	loess_1_star_RMSE	loess_2_raster_RMSE	loess_2_star_RMSE	loess_3_raster_RMSE	loess_3_star_RMSE	loess_4_raster_RMSE	loess_4_star_RMSE	loess_5_raster_RMSE	loess_5_star_RMSE	loess_6_raster_RMSE
cVG07	0	0	2.94493335334458	3.528970521229	5.42694141939764	5.66413369821942	1.62273388402956	2.62542585126403	3.89543747923383	3.85599402828449	4.47130122198633	4.42429917727782	14.6328495255259	13.8689937172848	0.2715754823842	0.598781806424865	1.52137604823901	1.82843322773504	2.03351983200749	2.36927302946284	3.55677470755873	3.79659032261082	4.97201608972798	5.17037818966434	6.84155843592528	6.99376974059481	8.71740196293125	8.83326045998819	10.823987552156	10.9023383135068	12.9274188012078	12.9731891448157	15.1273137741383	15.1362764728954	17.2934981722639	17.2670936357435	19.4722818322795	19.4112882290521	3.65101723459352e-15	3.05466017637139e-15	0.00204004557578995	0.00690957873186738	0.0360703985149332	0.147501620982055	0.0406652277249098	0.228297418283814	0.0499080978780372	0.329101769555339	0.0654939806128237
cVG13	0	0	2.8546083508817	3.14751973328336	5.59487860470332	5.59864429179006	1.92365436897498	2.57203382443976	2.5506212535332	3.27141781867581	3.16724028656116	3.63799017910225	10.4657696130289	10.9047488114981	0.233271725728582	0.730707355048303	1.41398756446028	1.95456819188399	1.71177713569941	2.43486953154727	3.03988930842658	3.66578614274926	4.16574375902961	4.78355295671404	5.78273986827784	6.35680620887964	7.38488141777036	7.94706600475558	9.28871371589116	9.82782682129134	11.2219616670699	11.7476203359048	13.3400003414624	13.8320488739671	15.4721059017053	15.9254439084339	17.6929006033685	18.0867683092106	5.03257995563588e-15	4.47156463343072e-15	0.00217954282684606	0.00540033943162987	0.0269755668151896	0.158576144808737	0.032087205667419	0.276000028629928	0.0428190175756523	0.416539221122166	0.058956057150362
cVG14	0	0	2.17486962869889	3.46535582284698	4.7438213990867	6.15448885671351	0.981894327015174	2.21634303268176	1.77321276543484	2.71865089699846	2.96146116337448	3.71524554042875	14.1646691094039	13.7201779644059	0.220812945517111	0.68360875025234	1.31881768301129	1.86604123753992	1.62846886436629	2.34061143198769	2.91028961402311	3.52000046122463	4.05653587247934	4.625687847472	5.67902668207295	6.18835916116812	7.31758028145808	7.80500282409219	9.2297310997697	9.69500717340641	11.1725451279533	11.617862895438	13.2630632925552	13.6866999715799	15.3571757496622	15.758511663898	17.5035516772826	17.8765143985512	3.82921918046341e-15	3.82921918046341e-15	0.00138297132875185	0.00780534475115843	0.0250152011320455	0.165027284751482	0.029110307996767	0.27560063755247	0.0380607375153331	0.402617117213315	0.0528179149838465
cVG16	0	0	2.60458590938303	3.4669495577565	3.96532785007417	4.97848553946873	1.34492658658907	2.30622086953175	2.1233207888347	3.1635022252082	2.59021960280874	3.25114780010965	10.611566467577	10.4958698084099	0.221391673059325	0.688900813429109	1.21386290742806	1.73027092641271	1.50895836999796	2.13903050916266	2.63135032961694	3.25552078437488	3.61631147572935	4.27701621108905	5.01615436178401	5.68739183665677	6.41956287158908	7.11793111215309	8.06323055133328	8.7969793483802	9.72554648799621	10.5038776851286	11.519523872359	12.3502447808913	13.3116248817975	14.1953711718603	15.1601041449681	16.093541128582	4.61821209513793e-15	4.47156463343072e-15	0.00211158454259333	0.0040075908156654	0.021450078895339	0.214665668556847	0.0250269726503922	0.30728995282193	0.033638929596279	0.416633131857346	0.048209416680895
cVG18	0	0	3.17352045980299	3.65141258226379	6.40490706029068	7.30008957752518	1.42983724387193	2.62287984429148	2.55627614536228	3.2538550486864	3.32029263264149	3.93349031658879	11.5059414554044	12.2485277465623	0.248726057424922	0.674588367580579	1.42636540964802	1.96395211313608	1.79421963623667	2.53608907756241	3.14670371442433	3.83451852316577	4.3446974147496	5.0190719255844	6.00990275711197	6.62921224596732	7.66992165335155	8.25784630480799	9.59894618082401	10.1620958369662	11.5493831550854	12.1053770289738	13.6543919615645	14.2157104447917	15.7599120049743	16.3348438329678	17.9281033267415	18.5243010445602	3.99948899445401e-15	3.99948899445401e-15	0.00220712534841259	0.00801615299991432	0.027596586532238	0.127579590339614	0.03182608239577	0.232506343488472	0.0414339558984267	0.357215601438946	0.0582128113482377
cVG19	0	0	2.74240625273278	3.46307849208551	6.23417634214254	6.20342874217991	2.14291937037415	2.95417152843121	2.71412133413313	3.14262294294762	4.16419637722414	4.29912258271474	6.42112129395011	6.80957238198546	0.225215486928061	0.69372841730527	1.33724621601548	1.7899895746098	1.60080570421986	2.13261504684868	2.84867173842494	3.29205870208693	3.9103743462069	4.30887949489709	5.44617859436474	5.78820698256461	6.95044158724382	7.26908409784786	8.7140873621859	9.04839162152	10.473501737232	10.8538118905613	12.3794254240487	12.8262091338275	14.2740264814487	14.792882169111	16.2424094359203	16.8337333517899	3.46365907135345e-15	5.53704178680165e-15	0.00282819563304443	0.00345181158828475	0.0246910079636183	0.183807804595522	0.029838140386855	0.290299988766903	0.0395367018401945	0.415745060683962	0.0566834667216877
cVG21	0	0	2.45362642404267	2.88858212528734	4.33918195376195	4.57649945367918	1.24856724430252	2.04779396282131	2.55667690180621	2.6489629144603	2.60697598579574	2.78510900928833	13.6096558543901	13.7076934881969	0.229605401145126	0.625307733867679	1.28286088336447	1.74205212118587	1.66317674498289	2.18653279315658	2.88361171819673	3.38524086258122	3.981244750562	4.51527963718915	5.47841712672092	6.06475850837322	6.99596209383322	7.66040964821226	8.75422444136416	9.524445165697	10.5502174134038	11.4307842447624	12.4803636612379	13.4694426357272	14.4185122127703	15.5000561635487	16.4055243726533	17.5649240353089	5.41533369831054e-15	3.99948899445401e-15	0.00250289360669731	0.0059650438512519	0.0273100822866054	0.177816243092542	0.0322603251219829	0.262541980165074	0.0414702825813905	0.35817769690358	0.056498815937413
E31	0	0	2.24351676254977	2.44008718106782	9.24856801873299	8.99252531523712	1.38727910035094	2.20180847291425	2.4580833914094	2.73983583040953	3.25388808778679	3.31982032107453	13.6943850987003	13.0206611144785	0.19583060957831	0.690478454782681	0.962649166468134	1.56967319068475	1.31315040071011	2.02930572280149	2.17052655400345	2.78329441137692	2.9436236734026	3.4890671280341	3.97504903885263	4.43696420558633	5.02330976935006	5.42739568202986	6.23722616866018	6.58671885966516	7.48108532957805	7.78502630114486	8.82049112053838	9.07666722127743	10.169837833487	10.3826094803185	11.5547789769055	11.721604744011	3.87248856721506e-15	4.47156463343072e-15	0.00300869788810499	0.0076591951223743	0.0267353944415362	0.265323228903304	0.0327690182199985	0.349269875157832	0.043689250749247	0.443573862359999	0.0610544041995467
E32	0	0	3.12063889055238	3.67695816529385	5.91068256644463	6.66937506794179	1.71879323080207	2.93069525445537	3.18904941619793	3.81287810251841	4.70200722858382	4.94215530785978	15.8512458057245	14.9539721302492	0.298138619196998	0.919651354166714	1.45104145191985	2.15632303719354	2.06910736607953	2.76124475217481	3.43073917131127	3.90832770353404	4.73012119878955	5.10137835654772	6.39374117531767	6.64326257266561	8.08371049994833	8.2046800746563	9.93657841232566	9.9088540445646	11.7722041214158	11.5848049069775	13.6452306748082	13.2944261327629	15.4694478952931	14.9603342947419	17.2672675909893	16.612493202586	3.82921918046341e-15	2.8280657892594e-15	0.00195881004079634	0.011734342723907	0.0348557950525407	0.244614392884904	0.0421763393050556	0.37224592808671	0.0579468223355899	0.534793356415444	0.0819761967060626
E33	0	0	2.03337771132124	2.64179925940309	5.27768995005357	5.81157340657921	1.14878877958718	2.23384363065591	3.42300023241617	3.9160917956879	3.72785001049791	4.70124020688127	12.7306451725013	12.1456698087953	0.234554806854274	0.7120113499191	1.24477790729296	1.73061803930458	1.80500604226845	2.30575452767135	3.08129942893584	3.45168492848307	4.28622636659548	4.58847234724656	5.76661293513837	6.00515639878919	7.22077825887369	7.41345541551096	8.79941625570386	8.93303710028728	10.3556933223211	10.4289244691655	11.9665080227603	11.9673272001533	13.5503343882372	13.4831752249551	15.1438841214601	15.0021202668589	4.47156463343072e-15	4.61821209513793e-15	0.00162411926118081	0.00800642471313809	0.0391312715796667	0.211621995109937	0.0412098429354234	0.3169204973602	0.0506589181297226	0.435845681732442	0.0669565631576792
E34	0	0	3.24542376061361	4.25172813315736	5.19534608827151	7.00340678248074	2.02824930888446	2.97154831934985	3.7435787930082	4.15444834025463	4.30034647914052	4.70387998203709	11.6336300897237	12.0268667620696	0.31212483877092	0.714992947249845	1.63819829061672	2.119605268891	2.27837757148989	2.85502932196635	3.89924672141407	4.46427190720063	5.42992506704222	6.02805608080863	7.40080746995548	8.03611886452411	9.36906054810544	10.0459755242596	11.5422441919635	12.2557945198958	13.6849772714281	14.439132381824	15.8908893191573	16.6807370793249	18.0307990991036	18.8484441888422	20.1526296760059	20.9877301151036	3.05466017637139e-15	5.03257995563588e-15	0.00150385206781002	0.00684728615636844	0.0410944467066268	0.206929124297293	0.0466698509011557	0.283633538362991	0.0606500867921467	0.393820344015089	0.0849144993635332
E35	0	0	2.73415026340984	3.85633805315739	5.47099729907951	6.92710889323032	1.87201580243879	2.64959610490114	2.96481146520318	3.72733935124764	3.94894382101739	4.34799643434839	7.26054165341981	7.44373973629963	0.234161948240784	0.704334471488236	1.27931502267195	1.73717120915954	1.62032198496246	2.11973429089095	2.79050387055196	3.12029035811828	3.80715479108657	4.0275304490907	5.22189085655822	5.31923884503858	6.61510544344292	6.61974229993685	8.2360298945291	8.15647389712166	9.85822847982669	9.717659955236	11.6078713052326	11.4147572236648	13.3490865986637	13.1135167022121	15.146880469857	14.871321331377	4.61821209513793e-15	5.41533369831054e-15	0.0022796446221965	0.00621604382903689	0.023515416339618	0.188071741182385	0.0286559500693317	0.29064990773414	0.0391216358556827	0.417360761584696	0.0569945975409053
E36	0	0	1.92595604373005	2.85719214179132	3.84498747944415	5.11854150437814	1.28651368800693	2.36338620162816	2.16793909606554	3.16109657604482	2.49627384678799	3.41651627095926	8.0298381007702	8.06273748301854	0.2113517014434	0.786873422651971	1.02743891566716	1.76647665968962	1.33853181875627	2.13859610289601	2.20196023453669	2.81674586905251	2.9367834542718	3.44505382118061	3.93299422348246	4.33210433598046	4.91476808850307	5.2331268383728	6.07072358619882	6.31081033343369	7.24376149931579	7.43023687359773	8.53706441041832	8.66161515843129	9.84108334037592	9.9117131939862	11.2172091490798	11.2175329613717	4.47156463343072e-15	4.76034406743969e-15	0.00276234189206488	0.00683232590219268	0.0209803183410573	0.184517189695739	0.0273946581435358	0.304712374433917	0.039793025489806	0.451453648417718	0.0600996750319607
E38	0	0	2.22273768472291	3.94785419131462	5.5194921026408	6.62644427207256	1.60012113264928	3.47022740996436	3.86577293674252	4.79530411706206	4.32705667598201	5.0674244314863	10.3681717025187	11.3961147329065	0.246043758465129	0.845749693890926	1.31327508234601	1.97278386728515	1.84344521938393	2.57549968126378	3.16348915778273	3.82068148075161	4.38885106829066	5.02730723472837	5.93443919852857	6.5258293829096	7.44839089928648	8.02355165302769	9.1132672879232	9.68764072863302	10.7529625970224	11.346365308139	12.4590515897194	13.0754293300228	14.1336851506274	14.7770362278569	15.824542485813	16.4800681751279	3.99948899445401e-15	4.76034406743969e-15	0.00105690594305792	0.00750732197255009	0.0373342847299735	0.35136044027111	0.0407159995475009	0.457240311248797	0.0485107633079149	0.557801129921913	0.0616021085641361
HC001AM	0	0	2.61133123722342	4.51415663508091	6.13716785153097	6.92719819940355	1.90719961946224	3.44104432937538	3.31419505641618	3.83944009064722	4.15413048808544	4.59476595312379	11.775033664001	10.8798979960081	0.2648071399124	0.827267289821849	1.42056809160641	2.0707119287724	1.86603969913784	2.70046643189731	3.21538935424796	3.99375378340643	4.44670423038609	5.23696443559171	6.11719702968389	6.89547749375922	7.7912626227663	8.5810498403279	9.70169111462885	10.4823636352086	11.6101547012408	12.3812113560509	13.6330051885751	14.3728219037868	15.6297831244159	16.323800659561	17.6622671682253	18.2826652234977	5.41533369831054e-15	3.99948899445401e-15	0.0023755822487967	0.00983320811731352	0.0331455068077093	0.244648443798762	0.0378173049328134	0.364215940780353	0.0485572062951976	0.497438428307938	0.0674373091856394
HC002AM	0	0	2.18584685037469	2.74880977942206	6.24066625672568	7.69512253295328	1.92286853012658	2.59067414280463	3.33407821990223	3.94415620036473	4.47126080893186	5.6019498941436	9.96630299238683	9.72478505278585	0.243255767676232	0.766032916699371	1.33403728845457	1.86413374837042	1.70859843628642	2.38065582643645	2.9691467184329	3.6446462751736	4.09473266569747	4.82430438022116	5.63765153153111	6.39693386574587	7.17693952927092	7.96870496271628	8.94501680316234	9.75284598815713	10.7217083971854	11.5429989901425	12.6143653348571	13.4373550527855	14.4958312281675	15.313826264314	16.4179507388823	17.2206065781265	4.16280012749695e-15	4.76034406743969e-15	0.00333815832387696	0.00558829697962616	0.0260214293177424	0.245955282531552	0.0324636749849691	0.360144023535093	0.044502208626615	0.484382952661393	0.065750897889658
HC004AM	0	0	2.28448304978683	3.4001840493246	4.24422215322684	4.67919309002729	1.26960027390611	2.49701186198768	2.09573727229052	2.73342168029916	2.63238539572879	3.06643939662291	9.17943572585256	8.92455973194684	0.198701936415684	0.663153993672149	1.22638713183762	1.64088744070727	1.4495209039296	1.94769133401798	2.59222874317543	2.99579228445467	3.55844418110429	3.93712875783587	4.98715778613145	5.31169185180589	6.41096448070957	6.70314106001833	8.11196729632664	8.36406984410661	9.83329209595353	10.0522182859536	11.7121529897783	11.8956991591661	13.5909769190136	13.744727416206	15.5405068973554	15.6637729192595	4.3199418498654e-15	3.99948899445401e-15	0.00219870095443168	0.00521452989699487	0.0289273385073299	0.226924101389394	0.0320292814784359	0.331940107959355	0.0412887980755001	0.430517713698852	0.0574098085311655
HC006AM	0	0	2.45099414991536	3.44630803900004	4.27866166609842	4.84226544152675	1.36364101844694	2.42955854628533	2.92256069877873	3.60853889634609	3.4187886628693	3.82298462443502	13.2307539207827	13.868700080669	0.252373895074024	0.675809301437298	1.43152813852921	1.85032033390975	1.87561923219962	2.34209849747201	3.28842455592297	3.70509401431942	4.59528471257721	5.02919762344517	6.3467559150321	6.79169420375622	8.11543189057136	8.57990147094469	10.1189482055639	10.6081831396692	12.1405758177522	12.6537717209169	14.2707475417632	14.8087067418887	16.3864185084402	16.9428140590169	18.5210906562195	19.0928630268381	4.47156463343072e-15	3.99948899445401e-15	0.0013549379504961	0.00676953905532055	0.037024100250288	0.250085505948512	0.0402534991680016	0.322130035980528	0.05007777441738	0.418578778675629	0.066905401839348
HC016AM	0	0	2.02080127932072	2.54596371693333	5.98139414871888	6.36836698300203	1.44485120798338	2.1842053498835	2.24570690713344	2.61454554679116	3.01560073193574	3.53391901301047	9.03728655097271	9.13230946946557	0.198966157566513	0.589474930102372	1.07218219310614	1.44707526826675	1.3325770757648	1.73646276450559	2.28252091060273	2.56416281187194	3.08876360734968	3.3035935071639	4.23981788411957	4.36077505523921	5.37578493761285	5.4161056252296	6.72249702838512	6.69782168868966	8.08493342511735	8.01845701545167	9.5782393923139	9.4767242934918	11.0823407865922	10.9595687332279	12.6588604653291	12.5151360762582	4.3199418498654e-15	4.76034406743969e-15	0.00153630767852865	0.00666590834495679	0.0262555912732246	0.213109544019349	0.0319107997271969	0.285922785751174	0.0427725389827458	0.375405741394765	0.0599466209246773
HC017AM	0	0	1.77781741475943	2.58745978278479	4.93332815137904	5.33263950431565	1.30981598592936	2.27108309418046	2.30232049606162	2.88543080480533	2.76157815761214	3.31018341686178	13.3672649791311	13.0375574449461	0.243747191107961	0.789032776003776	1.23191792859485	1.87974902104695	1.59025111262061	2.28902629278971	2.67829294562494	3.24029455934354	3.64141560666151	4.15229566849067	4.99515164996915	5.43478813896651	6.37167271182993	6.74366864825929	7.98119355593424	8.30195350956725	9.62507010690825	9.90453866876208	11.3980306630053	11.6496498802107	13.1860562597401	13.4164494661651	15.0287053491136	15.2439413112879	4.16280012749695e-15	5.53704178680165e-15	0.00135659721780207	0.00957585428079043	0.0254589018420798	0.240682051554675	0.0300751580597152	0.33433054947326	0.0407200604451278	0.467217416377203	0.0611242252674411
HC020AM	0	0	2.94802425302244	3.93360871118863	6.24778878550087	7.2707124560978	1.60515709658396	2.81277828652862	2.85717107956151	3.12831619970248	4.2426171148539	4.65768076625758	7.16775941210777	7.14126270980099	0.221319233596076	0.631344583591761	1.32188822859948	1.71821563434191	1.59359712607193	2.07840676341009	2.82094975651198	3.26048919530624	3.85513033329567	4.33638885451202	5.3550709224229	5.88157839591473	6.8353823518382	7.41801507479514	8.59347680839156	9.22133006031125	10.3573909360665	11.0340245840745	12.2747630401495	12.9947808700104	14.1750191568391	14.9402737294146	16.1444589187873	16.9502026233118	3.46365907135345e-15	4.47156463343072e-15	0.00102962469884998	0.00659930588739767	0.024869019501566	0.175212872062029	0.0268346216351322	0.281413057905902	0.0336626040174098	0.38767549179421	0.0471552379955993
HC021AM	0	0	2.85381364694502	4.20844839435126	5.16981676936125	5.44120899833903	1.74119146620263	2.92217405083534	3.11020624218194	2.99494599277051	3.28134451589931	3.43473581266371	13.3899094065169	13.2253801207704	0.257513140528469	0.932288245497137	1.51930650293206	2.10797344141623	1.88718649365859	2.54797807810402	3.31809014785847	3.8576033354678	4.56834848766331	5.05880925266559	6.3485080087853	6.77704498684423	8.13331197496617	8.53150334601638	10.2310191333698	10.5919165207916	12.3581319200331	12.6941515898083	14.6592004373162	14.9709796559986	16.9602759235023	17.2599041614558	19.3322489411048	19.61693274301	4.47156463343072e-15	3.26556908942977e-15	0.00152912526652735	0.00789598877147873	0.0315596199673646	0.246879001279735	0.0363995744357132	0.41678876203132	0.0484046136279441	0.602716358114345	0.0678717968012598
HC022AM	0	0	3.5443644429502	3.45958238556675	4.99208394166476	5.67984650866399	1.48439773596842	2.0953180965737	2.57699948386064	2.97052820577721	2.94313976112108	3.40210489679505	13.3849688019829	12.8023777308438	0.270235247309029	0.590260028032967	1.62626516109017	1.88502956685625	2.01629098600113	2.30718971022627	3.58686773589073	3.75970269530645	4.9806495857205	5.07724822175878	6.93780251191253	6.96392177345115	8.90675165748424	8.87138436729199	11.2001465504038	11.1171574977852	13.5287465091959	13.4008939902714	16.0330118136641	15.872265789517	18.5355898370149	18.3468806906886	21.0993535114276	20.887266745268	5.16331808962007e-15	4.16280012749695e-15	0.00130956757473483	0.00753145241490798	0.0366280100787471	0.126360026759424	0.0392680966555673	0.220484816958957	0.0488565872278249	0.328967611489902	0.064582853889232
HC023AM	0	0	2.00236773007864	2.44866602603585	4.24619728854017	5.28479037085369	1.5154549422034	2.02862233260569	2.76326519738368	3.47140847283628	3.67820335711067	4.52973611351219	8.99076476526993	9.51027712769954	0.189999720006117	0.641046456579822	0.989635499835536	1.5175777417683	1.35434049404252	1.92390746262085	2.28987651973737	2.86850094840601	3.14280215180738	3.80347039208471	4.26129454471531	5.02061873507286	5.37172943496571	6.23713598270178	6.62567503120032	7.58819244497214	7.87867167078402	8.9300716943015	9.20346728242993	10.3350701190042	10.5181897094183	11.7217798465942	11.8562065350388	13.1251544485722	3.46365907135345e-15	4.16280012749695e-15	0.00139687930168625	0.00608145627321571	0.0212060955679562	0.213037651354553	0.0271023354934043	0.31101442928052	0.0371012736810634	0.403551606584112	0.0525125278751991
HC024AM	0	0	1.7804734480101	2.5690166479637	3.69772130582944	4.69472003732967	1.27753698408548	2.19009855938887	2.50075702969271	2.92317770742937	2.81338914785042	3.36871056684752	13.4362217131776	13.5149852687326	0.229324347372958	0.759568047631242	1.17455701007134	1.75578602606704	1.55969479981039	2.23494172658017	2.65650049628751	3.1914718244039	3.66009907740509	4.12403466077073	5.00681633102254	5.38573952191762	6.36752497328182	6.68347261826098	7.92693904792533	8.17801295472339	9.51120987674599	9.69406632525581	11.202309238106	11.3172910682595	12.8940589576852	12.9436758034863	14.6210780747985	14.6118917533226	4.76034406743969e-15	4.16280012749695e-15	0.0014054987527596	0.00767115383849032	0.0280769207482699	0.268083374374201	0.031278237524978	0.371426166976759	0.0403822840094294	0.483843338807275	0.0561622363828278
HC025AM	0	0	1.8857881050114	2.41538774926034	4.43402832138033	5.41469800970946	1.20961811820436	1.9975364792222	2.23213817785691	2.53129591106794	3.24544478667571	3.53183602519969	12.7658162903516	12.8917347395553	0.208095002574595	0.71818459956693	1.12885454262448	1.67755627394889	1.41472074404745	2.00666349095872	2.47150294578118	2.97315204425391	3.4102468356226	3.91470019675533	4.73168292298192	5.2529249319602	6.0717073670794	6.63305757409919	7.63540877540948	8.24223950770901	9.23268094767744	9.88510181168334	10.9481012947661	11.6482270077083	12.6743321737046	13.4132161571225	14.4398306110474	15.2109251301097	4.89835363414465e-15	3.82921918046341e-15	0.00204424722795138	0.00549152509672083	0.0242884897369528	0.277526833504933	0.0286713054048896	0.364547477267823	0.0392725876745159	0.46007001296973	0.0559756393437644
HC026AM	0	0	3.03726217525226	3.55577735809769	4.93317094278463	5.53737550537608	1.30492442202373	2.19176719464365	2.65501708733627	3.01557636561537	3.14734666887289	3.4938713970415	15.4117359736019	13.5841954154984	0.274766703464969	0.652021234883939	1.60935978681292	1.89492300524905	2.0211419863712	2.36601856425661	3.59063275129041	3.80536798764518	5.0100540640053	5.14053350069717	7.00235597029156	7.00616973992306	9.01617122710089	8.90038207997699	11.3435036978269	11.0999169976491	13.6900694059484	13.3294641702715	16.1878032831925	15.7196782266227	18.6633752986008	18.1056108673649	21.1789634178975	20.5414838718702	4.16280012749695e-15	3.65101723459352e-15	0.00169294897996341	0.00709905627345941	0.0311893649018212	0.217838996598674	0.0362590070868295	0.298848416999891	0.0459457914615128	0.395088193516702	0.0625284642250715
HC027AM	0	0	2.51251970880208	2.88950928702269	6.59233941158889	6.26538690610629	1.62578428189388	2.42773429594928	2.21017312310885	2.95917852243279	3.1737105959535	3.89780379294678	12.2530052753997	11.1245687693747	0.224429723564874	0.687986929933556	1.26662332677012	1.70593835806167	1.55693169581926	2.02850894100964	2.69285016777262	3.06365733335169	3.65476321572362	3.98573329708136	5.0419377724349	5.35698269191065	6.41814686982324	6.74781253053516	8.05239550798681	8.41346009078964	9.71561492062527	10.111580087232	11.5396108469787	11.9734775734474	13.3850949930509	13.8564547174356	15.3135776344575	15.820071307833	3.46365907135345e-15	3.82921918046341e-15	0.00159105093260814	0.00902998769850092	0.0262717301693889	0.200232808030812	0.0317967077810973	0.304109574303566	0.0438631564964015	0.419628303985691	0.0616762730859766
HC028AM	0	0	1.95045799673531	2.44988029804125	4.78918999189518	5.67741523627515	1.5739838482189	2.17972249451543	2.73534304739465	3.17797399407209	3.21458948421332	3.71983003602834	15.0173070384102	13.8763349899731	0.223733517455279	0.710106604237464	1.29823292683233	1.83460662710333	1.65803861074699	2.29520088427783	2.89391472915944	3.43796172134038	3.99362326664775	4.52235629777252	5.51841263903064	6.0397874948451	7.05793439220276	7.60078659561289	8.85111026668863	9.41785781006325	10.6841215693664	11.2678266089324	12.6651919286997	13.2533959964019	14.6679000475096	15.2461904339389	16.735005556841	17.2897667237647	3.99948899445401e-15	4.47156463343072e-15	0.00185500730855779	0.00557464219476834	0.029385459250182	0.212790891176824	0.0329255994127998	0.306341058468328	0.0411237591117312	0.425211765789984	0.0575979249610227
HC029AM	0	0	2.95987947779188	3.43024808505474	4.06329012245712	4.68611631435554	1.47369958611153	2.39990615855758	2.29281383326092	2.77758822376342	3.48813542543449	3.9032637876041	7.97883570787669	7.84252544785536	0.223606324156717	0.62829699831277	1.33960239561963	1.68878661748194	1.65271492618717	2.10338781018741	2.94381359275598	3.32746927867061	4.08030557216041	4.43695416401867	5.68273312627959	5.98346635191835	7.27753197999468	7.53628028673612	9.12859073586143	9.34980279808873	10.9848247221285	11.18475014744	12.9747865889768	13.1622647311309	14.9469521140943	15.1320439451177	16.9688825413163	17.1562041670638	3.99948899445401e-15	4.89835363414465e-15	0.00176280579391591	0.00519435040450134	0.0273456956607833	0.214452913437064	0.0303042775514322	0.317702365937964	0.0395665332610869	0.405669426192679	0.0557110295805404
HC030AM	0	0	2.38440335054931	2.9034092537797	5.18475051345548	6.11558130854657	1.62032202698132	2.35369882360401	3.38137353989607	3.68014326458071	3.92289213262651	4.62743443558766	11.6760280795312	11.9716866004801	0.256459439409335	0.693556028908645	1.25481278975828	1.75737888920141	1.84302958028823	2.41752358197775	3.06541047344235	3.68802198060107	4.20913923369292	4.93532332580812	5.60124573527702	6.43552803032158	6.971508563855	7.90370263428427	8.45843819160033	9.46893167578434	9.92644373673575	10.9995160451596	11.4429271069033	12.5584946954495	12.9343957008884	14.0757579904058	14.4337395631635	15.5861098167277	4.16280012749695e-15	4.89835363414465e-15	0.00256345607175518	0.00640446955745142	0.0339864588261465	0.231028722125075	0.0385772357453666	0.330456300033267	0.0501083090115687	0.430134335476073	0.0708321219946689
HC031AM	0	0	2.30764631506041	2.64990011330542	4.72560149244454	5.56778113392132	1.40428679261612	1.86477426349312	2.6823077170621	3.08280631078392	3.34067686804967	3.85124715379559	9.95259190923547	9.78635846360083	0.1806737873283	0.60295832744343	0.890515423297777	1.34749395432281	1.21616830903034	1.6944645284804	2.04373528266281	2.35695540381966	2.80260079952843	2.9911492892184	3.78572484983124	3.8574252973392	4.76323058488629	4.7540327960385	5.8553697690374	5.77936816568861	6.9548691848141	6.83623075341747	8.11745306985151	7.97215344955823	9.28544504121147	9.13248965904609	10.4817876274023	10.3303634192664	3.82921918046341e-15	4.47156463343072e-15	0.00194917686847355	0.00672736179302093	0.0203695455221751	0.211907538364695	0.0252945676055835	0.303343505983591	0.0346537049818033	0.396855098882707	0.0498773070571723
HC032AM	0	0	3.4498479076078	3.07390235718414	5.87438442560356	5.75912477086845	1.52217089687491	2.46588204194518	4.04058944695891	4.07854379343782	4.35920143860666	4.39982270409973	14.0730981889008	13.7669450987394	0.310333161036145	0.800497950936796	1.76090095834088	2.20248197717615	2.37939931625815	2.87513885522404	4.16159353321469	4.57745658704083	5.82871533210665	6.241337842911	8.02643584432047	8.402389469002	10.2271547700895	10.5743436790257	12.6836597420108	12.9748728073518	15.1170617732126	15.3546784952354	17.6404896832085	17.8109929112174	20.1007837580985	20.2057869655546	22.5557624150087	22.5903221584276	4.47156463343072e-15	4.47156463343072e-15	0.0016404352682138	0.0108168845349961	0.0405518190776658	0.303113552123032	0.0464793464615868	0.398466349097584	0.0578456133915905	0.494546268171527	0.0757274963075596
HC033AM	0	0	2.80570159051653	3.2017856514644	5.58903688795101	6.64848626767711	2.40715943383418	3.30212931556308	3.35150387545719	4.06686911611533	4.56325895147758	5.49817740893361	7.03971307216896	7.2105064213058	0.231606791879506	0.620462878359827	1.16137531088128	1.68067981343021	1.68104155747056	2.3476960722126	2.82769626537224	3.50822997974582	3.90136568720889	4.61060804147766	5.22044173206888	5.91990734269769	6.49948548681837	7.17496799493595	7.87137980995918	8.51506076497556	9.19193571537105	9.80593024871752	10.5382285437108	11.1212050160988	11.8355735034039	12.3873689531386	13.1347777834826	13.651482895921	4.89835363414465e-15	4.76034406743969e-15	0.00201890879723109	0.0106840450360956	0.0348488735659189	0.139375389641345	0.0412457972219941	0.225751355484756	0.0499891729951753	0.335547335869689	0.0668070527690365
HC034AM	0	0	2.10327871128267	2.45011350640458	4.7067804968244	5.1464455111396	1.44598446522625	2.07969612754724	2.60191346000529	2.94429149682458	3.01775190418408	3.58781364103177	8.48605381134637	8.99980049994666	0.223130453937287	0.658711904509858	1.2272174130293	1.65565631560107	1.52165388467273	1.97714358158862	2.62374257509367	2.99174431049727	3.56738492915546	3.92462866365207	4.9358298073994	5.27151316753647	6.30422383935304	6.63548584807828	7.91962860816721	8.24480658450807	9.54377177705235	9.87296620496232	11.2984812746763	11.6392726067533	13.0422964091058	13.40199509925	14.8440840101322	15.2250470401953	5.16331808962007e-15	4.3199418498654e-15	0.00171120960345588	0.00710750634303874	0.025378035819975	0.231565951620704	0.0316241517142236	0.300737805808446	0.0430829889058467	0.401779559625618	0.0605836357323965
HC035AM	0	0	3.30871454260334	3.25186351726278	5.20873700959631	5.40921456814753	1.712193454565	2.27776755535705	3.27812682872998	3.2507140099991	4.25832013472101	4.09007315855542	8.07248376007677	9.32983089473791	0.256425470236871	0.65221144382979	1.42006235125359	1.8471285504542	1.8179733745883	2.3638965079331	3.16818169517821	3.60115430142212	4.37242645990515	4.74058950844599	6.03601875942027	6.33206992557944	7.69321381852706	7.96961203026089	9.60108690061676	9.87558966627399	11.5049746700748	11.8045340305015	13.5263934591375	13.8555462728266	15.5156565837769	15.8871104580368	17.5373605771061	17.9502297779243	5.65613157851879e-15	3.65101723459352e-15	0.0021668262222333	0.00885351283114175	0.0346915715989885	0.134914034937156	0.0389227734454565	0.235827883622288	0.0479449098659825	0.352700209841724	0.0615514873639411
HC036AM	0	0	2.3498748408317	3.04410712740755	7.14794460329023	8.74525770494457	1.28010286700977	1.84295481921829	2.59878768968135	2.87198647769217	3.55411810329826	3.51053848067518	17.6284969225988	18.3964227531779	0.275882128279391	0.635498058385083	1.62068090927752	1.89586688600048	2.03892880220001	2.30127736557324	3.62097377811739	3.78790764557706	5.0416812249501	5.16657607421856	7.02809656361529	7.12969606821519	9.03235176152133	9.12623484789519	11.3595874046198	11.458953167353	13.71884232086	13.8355835959789	16.2470274842932	16.3957176699682	18.7726281377719	18.962872386	21.3546308758234	21.59631166992	4.61821209513793e-15	4.61821209513793e-15	0.0024851239279624	0.0100476678904513	0.0381290191035426	0.211427296404249	0.0433001482397672	0.297297148890083	0.0500737642869831	0.395101516731559	0.0635572599217176
HC037AM	0	0	2.86475685392786	3.08809816894204	5.85163866414618	7.3692769306241	1.51563249524638	2.48388727396303	3.17334789279856	4.10960491086747	3.56630611552757	4.805364271372	13.7745949635825	14.196661955515	0.274702641097372	0.7882557074326	1.58930059803831	2.14704127970152	2.03532057872778	2.77346036073529	3.56900341542864	4.24655427301869	4.94401965749923	5.63073174179495	6.84154604368262	7.53883931339466	8.75498818924563	9.49379528863617	10.9668468601087	11.741575625815	13.2019007899443	14.0007582430979	15.5845131920266	16.3865170587655	17.9499001962084	18.7365100486559	20.3582844600381	21.1132513764688	3.99948899445401e-15	4.47156463343072e-15	0.00256175479208666	0.0074682457410707	0.0342242640105688	0.210730671226299	0.0396197488989207	0.332847790925235	0.0478151861120377	0.463617897038381	0.0638277905364281
HC038AM	0	0	2.58749906834801	4.20707014849691	5.75362668269198	6.39357846176551	1.53902451391159	3.05558189807638	2.60480967835461	3.48507999184088	3.35973353868669	3.92002250729401	14.7524019874249	14.8610925674933	0.206483615618433	0.760018720891242	1.19373016288117	1.95200090663967	1.49871425644951	2.41194005803868	2.6225817205332	3.33002052510557	3.59817158869669	4.21551669766518	4.9695152240391	5.5117877701224	6.34053752880365	6.86354504454599	7.95992381220412	8.48283820085036	9.61712101276891	10.1576054871771	11.4313444382349	11.9836528367844	13.2706474412087	13.8307944072585	15.1876321845055	15.7421024842504	4.16280012749695e-15	4.16280012749695e-15	0.00214788913467199	0.0108766600764041	0.0315075191973072	0.146498334704144	0.0340700321407933	0.259366732073828	0.040623567190011	0.40285163850686	0.0541100728055334
HC039AM	0	0	1.79558147350003	2.90160716794364	3.40877661263799	4.83562706581253	1.22157167614562	2.76347495805788	1.88064896153313	2.94046904536969	2.58768441982382	3.49598532089831	9.01021685020226	9.32257079164286	0.188229262277784	0.58640098589324	0.974263172127535	1.48350225671857	1.24744036606336	1.95035642874969	2.11827906528253	2.83775981298115	2.89447614467068	3.62574176943477	3.98037693041046	4.62469329622852	5.07845790899167	5.62105346847788	6.3581883743662	6.77913416195344	7.65923955696364	7.98003643433415	9.05696036670459	9.29103839701949	10.4543046589105	10.6198194620597	11.8867650115347	11.9932016506366	4.16280012749695e-15	3.46365907135345e-15	0.00187116691911291	0.00681283527190046	0.0228137527673461	0.189869151341734	0.0269973091346827	0.261844538593763	0.0367048519743961	0.349829885326046	0.0543307212195208
HC040AM	0	0	1.78591125073897	2.36760144824933	3.19742742003931	4.23260804999939	1.19246678470729	2.04039499361519	2.12126007408295	2.63591605056275	2.31957594760401	2.9363021968841	9.33269342114796	9.91463270011146	0.16962133077819	0.620582503578992	0.790665968555126	1.40676342879177	1.10665356109973	1.82278120766428	1.78431436632769	2.4503826960074	2.38894696204314	3.03079485709076	3.17724990959738	3.7856696023043	3.97842642416011	4.5787188444959	4.901438795013	5.49759757802203	5.84858932930402	6.44436832111645	6.86751833141803	7.46054927323899	7.89753499563678	8.48558853012848	8.95680671335646	9.53741203279673	4.47156463343072e-15	4.3199418498654e-15	0.00233668699960298	0.0102190333633129	0.0209487190964467	0.219568719555093	0.0263459724049445	0.289804655028431	0.0361581657247716	0.383147663028971	0.0518206476676716
HC041AM	0	0	2.28991069953154	4.51519278842098	4.09480176542674	5.12052882271262	1.5810326242191	3.79296169168387	3.09828828216172	3.50565658641422	3.76157310130489	3.90412752389168	9.31022955734951	9.98330199506837	0.236145593862227	0.811350111605043	1.3703096369054	1.98658615238653	1.70392733702504	2.46856389304824	3.01748936784841	3.60588178406262	4.17761120494147	4.6485999153132	5.80557043397751	6.12555496069581	7.42077532555967	7.63523374024339	9.29463380275585	9.41246315119208	11.1703550822565	11.2257160998576	13.1807567276754	13.1937666617451	15.1716636389689	15.1714280218003	17.21302380272	17.2153522644967	3.99948899445401e-15	5.99923349168101e-15	0.00105267704587596	0.00691094519460923	0.0298126500492037	0.224644905293852	0.0332513689688539	0.354442387337168	0.0408337929902469	0.493975988746942	0.0536299325885188
HC042AM	0	0	1.95433858755031	2.67955215318979	5.69342332136781	5.75562326741983	1.37800475761987	2.25956634763929	3.36124777077177	3.85477584609925	4.07638355555006	4.53858901052746	10.6817680918765	10.7921004032989	0.237646410238741	0.720914083115947	1.2551188079632	1.76536712453031	1.75562074572755	2.24783941305272	3.00822862680842	3.40405321950666	4.15980250116054	4.55693215488215	5.62371151434937	6.07725273467439	7.06143873237503	7.59363962617375	8.66179926021545	9.2648001275155	10.2513648534272	10.9166446611639	11.9202478593757	12.6300638164459	13.5709967921856	14.3137636149098	15.2413543148791	16.0098658208273	4.3199418498654e-15	4.47156463343072e-15	0.00252528874400015	0.00682218615213024	0.0391669376290856	0.249635077176371	0.0431407383756423	0.354126526915837	0.0478388807607387	0.454322741922314	0.0587609324449422
HC043AM	0	0	1.87803007065794	2.44580270549129	4.02963362455389	5.02302676875624	1.28012450011609	2.13342340480908	1.81635536625185	2.87924660234356	2.95689385793954	4.07615076086818	7.62947795653256	8.34511715154783	0.191308443594243	0.676885519446245	1.00382174509012	1.57750483453862	1.28195297707846	1.97892727696737	2.19697401562102	2.87474222504144	2.99904376283325	3.7297005801453	4.11872919399208	4.87130629244795	5.23126105234091	6.01274336807901	6.52379586758197	7.3245606219672	7.81958278433069	8.64004734189728	9.21404726080941	10.0505606003754	10.6018277787841	11.4491990218174	12.0357130861366	12.8875943471625	4.3199418498654e-15	5.41533369831054e-15	0.00183604442337358	0.00526380969305576	0.0243319703626734	0.211970871104309	0.0281337505279456	0.312553028212284	0.0334942588029408	0.419793926784082	0.0435716661284871
HC046AM	0	0	2.49072092220601	3.5225160562309	3.8309283067763	5.49685109286911	1.10199660897368	2.47258860188994	2.54383323233316	2.99070967419638	2.83193971263247	3.6149591313305	13.5157600919737	13.0970463139207	0.25260405770272	0.626306191251534	1.44317814305851	1.82165127289349	1.86379055742979	2.26416189802876	3.2710684963452	3.55374357894352	4.56466406865217	4.78140525416555	6.33161241185994	6.4517332562831	8.12887523926201	8.15968878082418	10.1786603307594	10.1239404032652	12.2530256969734	12.1291009017252	14.4422354041574	14.2661346087698	16.6204973626245	16.403703658146	18.8221593942313	18.5747915213523	5.16331808962007e-15	4.76034406743969e-15	0.00215694385583653	0.0113071589401211	0.0334699114180334	0.177695897924473	0.0365692022743581	0.246180142268742	0.0444906880896556	0.347622104669747	0.0588804234991296
HC047AM	0	0	2.45131960355954	3.20790373165837	6.39375464741996	6.33925229618159	1.46519768657492	2.61835670192394	3.02085081046113	4.15457829448775	3.99300359468236	4.55013260467392	11.7201887678477	11.8263849587314	0.223505159982175	0.70302153558996	1.18196893757756	1.66803716575462	1.53202277452177	2.06973973283096	2.64552721696456	3.13754008157867	3.65111662289066	4.16241748211788	5.03046177555093	5.57020769419244	6.41363467308512	6.99433836765156	8.00198568931614	8.62760714279358	9.59604769310383	10.2712273079841	11.2881877867849	12.0117208354593	12.9627404324069	13.7312581933104	14.6632967870178	15.4785898954772	5.16331808962007e-15	5.03257995563588e-15	0.00169801676273387	0.00654627683913119	0.0274412118513313	0.199804717106313	0.0304394431825193	0.334299419219105	0.0379428964205338	0.455541627974936	0.0540949847650761
HC048AM	0	0	2.03146774275279	2.54752662384072	4.86298186646424	5.24400244664843	1.34242624043593	2.24999492943323	2.44325839747386	2.57169975500609	2.78659929429271	3.26317033353064	11.1589317576232	11.4497726441476	0.216470270508818	0.709329530028438	1.22266733636101	1.7200139056752	1.54279658325742	2.09599185844983	2.70098929559408	3.11242044025879	3.7314997799379	4.07324038081744	5.16895291086377	5.43625489892918	6.62019774127173	6.83001050210242	8.30285636844872	8.46712001149533	10.0094515251494	10.1506872542705	11.8346080833201	11.9670124843177	13.6609820849989	13.7969721163766	15.5296494359905	15.6804377668626	4.76034406743969e-15	3.46365907135345e-15	0.00132259640128286	0.00915894009832308	0.0250445859570409	0.265940447302007	0.0285582153600406	0.361756676398631	0.0378224898253117	0.461713600261365	0.0534505042567661
HC049AM	0	0	2.20286542842316	2.7123362119026	4.50405248464573	5.6089894091545	1.61207827796107	2.43403892745258	2.10256502237009	2.67135040114267	2.44654485903472	3.18154827397948	9.39605991828486	8.47735327366918	0.219261997892029	0.735750545548018	1.27559873929656	1.85862076532575	1.51869420785729	2.1843863966359	2.656484284967	3.18272559652913	3.60650584566732	4.09277964455569	5.0185333760122	5.46515780649987	6.4211435786808	6.84612631762195	8.10184139857135	8.51089820864837	9.80693861257831	10.2035601280641	11.680605860356	12.0785592551066	13.5677997482662	13.9649636600135	15.5432225603818	15.9449273973405	5.03257995563588e-15	4.61821209513793e-15	0.0022980428892027	0.0093036794788552	0.0272224518907524	0.186490316194937	0.0314550665084607	0.294382592844584	0.0415559742809716	0.421910036025564	0.0596315857992888
HC050AM	0	0	2.95462506802	3.7590352233442	5.34246945257252	5.91860499060178	1.40529414952197	2.8395025708758	2.22169848584741	3.4045630471248	3.52448728276877	4.20815827701397	8.25081089191562	9.60397140739109	0.206588842774128	0.68958639595542	1.22803843147131	1.7980409668531	1.5350747226442	2.29308211503589	2.67532639140822	3.45176196603304	3.63662847798265	4.47832563107285	4.99129152861031	5.86127361133477	6.3274797200766	7.25701578508394	7.91409617581198	8.90866772077383	9.52572975635195	10.6111689996547	11.2934436231057	12.4740737687518	13.0743174954145	14.3569671396944	14.9312190021963	16.3057880550062	4.76034406743969e-15	4.89835363414465e-15	0.000858008907603131	0.0044363182133155	0.0279399691016619	0.241956812937697	0.0309420289876868	0.321279395807119	0.0378815469424962	0.418830934179898	0.0507513924829898
HC051AM	0	0	2.1264273435643	2.50342721734187	4.17939979388665	5.38082527208738	1.35957181515963	2.05331541078427	2.42910125478968	3.15843714319774	2.52775000666553	3.31663079955822	11.5841605087562	11.9951942795383	0.239330666324418	0.629830603589003	1.41202890128548	1.79578347987279	1.72435636799679	2.13281978658715	3.03974056340065	3.36525460495553	4.15803521783168	4.47535500268498	5.77158806066425	6.09595084929448	7.38506884816522	7.7366609114315	9.30559870317801	9.69440494768634	11.2591290458985	11.7010697888843	13.3883230084927	13.8925177385718	15.5250745435248	16.1046156274301	17.7395181725556	18.4043420728896	4.61821209513793e-15	5.77276511892242e-15	0.00151489292664087	0.00729708613587629	0.0272959501821411	0.118222244145229	0.0302932595524133	0.22175610013139	0.0376452223634014	0.34722308260928	0.05177128082913
HC053AM	0	0	2.92417923712667	3.31023854441959	5.16039150464505	5.43523584561765	1.41931213589309	2.4172148586091	3.35582458825431	7.71366762656649	5.02124623366093	5.04233823542189	12.6694786746962	13.3296940987488	0.276661218535752	0.659456780783939	1.42853322603416	1.84432946957027	2.14352335082083	2.64732530061442	3.66076183491391	4.20046195770055	5.13812622523622	5.74784009796339	6.91070375992145	7.57034832485711	8.6572144275546	9.35427806799653	10.4966077829462	11.1921134971122	12.2741620900246	12.9459353943097	14.038648986199	14.6597109670998	15.7181434594446	16.272934355394	17.3354674504242	17.804837503707	3.65101723459352e-15	6.10932035274277e-15	0.00273823585603533	0.00772567312829308	0.0499054377418508	0.226706889401361	0.0524141650921963	0.298848629227553	0.0606677221413546	0.384992780298384	0.0733988816980714
HC054AM	0	0	2.01569535301984	2.6999336957794	6.90695009627022	7.58274277857661	1.31452516807879	2.16680955561095	2.39737297526289	3.096823000766	3.04994848384074	3.82817817476719	14.5685544821116	14.4059693694615	0.219433313395565	0.757536058314984	1.28084865091578	1.78893879365617	1.56931132441617	2.16240569705062	2.75007165087181	3.22721053796943	3.7427508654449	4.19248540535457	5.17940073796679	5.59103031163187	6.6072443874109	7.01850725910804	8.33229568121038	8.73634461960191	10.0988805653031	10.5174803406602	12.060168247051	12.4808530096334	14.0462102351075	14.4742016228495	16.1292954412915	16.5566711578278	3.99948899445401e-15	3.99948899445401e-15	0.00123181403458687	0.00510762209484412	0.0250060054911076	0.260659230127448	0.0297335007695448	0.374701538424389	0.0400266097387732	0.495599157905706	0.0569147148696037
HC055AM	0	0	3.57651224830914	3.1993855098361	5.24934440015522	5.11328454097894	2.03532710699022	2.52994417477469	3.5600742224723	3.08968032710843	4.22494700277392	3.62966239933838	11.3601375777253	10.9079048886843	0.272127536377399	0.728963142402188	1.4560339004928	1.94241071097079	1.97150470332762	2.50723502693536	3.38450005647808	3.82880979592354	4.67883594025948	5.11132537020711	6.38876278815764	6.8134045942786	8.09692565412089	8.5288966924005	10.0239183097728	10.4599022645363	11.9443263615982	12.3956006231441	13.9561108934952	14.4275428104679	15.9313063800085	16.4300110014907	17.9173361688308	18.442738238423	3.46365907135345e-15	5.03257995563588e-15	0.0015784855264816	0.0100148748496341	0.0369343873472217	0.213255563621995	0.0415313821840731	0.314133057139594	0.0512061908992824	0.42838589870603	0.0690623611212626
HC056AM	0	0	2.29428786143875	3.31177474789103	6.34445667939982	7.09567113381553	1.70749822339096	3.15512249095478	2.34347153603562	3.27720009692044	3.87881235843429	4.58416670795897	9.156368171098	8.50498965629543	0.253261079726331	0.786592082174204	1.44917536805023	2.26643748185801	1.75348871631576	2.93350809950148	3.0494161506232	4.02945998790653	4.12845961271823	4.93835184614589	5.72277040410084	6.32644469483079	7.30550423827133	7.78498231460308	9.20287970493447	9.57390455707083	11.1191646325711	11.3977663231676	13.2174447937632	13.3916093250627	15.3134395869361	15.3894528762242	17.4979308620333	17.4738222641123	4.16280012749695e-15	5.16331808962007e-15	0.0021204411181407	0.0110420983202512	0.0341440093734745	0.131261829820752	0.0409782831044946	0.243253795687017	0.0506579817562368	0.383729425081894	0.0688482395969845
HC059AM	0	0	3.03306009786523	3.45988223472968	5.23035078821856	5.39507727908763	1.53415761741277	2.9423563417268	3.23431104047189	3.51498969191565	3.90415289877815	4.10734199683547	10.8920429534122	10.4282700385131	0.224207519652766	0.711460212280568	1.30073597178682	1.8175234012304	1.67388228403776	2.28870805311528	2.92063758478047	3.44688135265275	4.03363121775732	4.55209259202517	5.56414665586361	6.05128796276133	7.10150123817492	7.56443570905318	8.87657723540806	9.31136298175193	10.6730842101083	11.0829876518076	12.5939248796857	12.9732894781621	14.511841757696	14.8518283694653	16.4716943935161	16.7651315089204	5.16331808962007e-15	3.99948899445401e-15	0.00162678109464384	0.00837232565708405	0.0309060419325758	0.133936008446078	0.0323028544358278	0.266553728235546	0.0414119911859998	0.415601226700427	0.0591734845442459
HC060AM	0	0	2.38766261781391	2.87390443214097	4.77359626480392	5.14806198058601	1.59265004219191	2.46178435697553	2.49218894813871	3.16641443109503	2.94900979727655	3.63125483616148	9.75602154154797	9.41847694298873	0.220452407575842	0.780169962499383	1.27493318800362	1.86614571580086	1.58074628591076	2.21069690663143	2.72639886871295	3.25209754343266	3.68479769310674	4.21562963685035	5.07364452311869	5.62953233573756	6.46131810733464	7.07000406500652	8.12408986180188	8.79464074354791	9.81879697096608	10.5628555403132	11.6782653067177	12.4863984960222	13.5497670156787	14.4155561904464	15.5006398469696	16.4097140790746	5.03257995563588e-15	3.65101723459352e-15	0.00222952258808817	0.00825845332368998	0.0314319902129341	0.206072813817142	0.0332463769329226	0.333250772742797	0.0427306583951169	0.476263007925503	0.0600828259261551
HC062AM	0	0	2.28695422783463	2.71500386067874	5.13200285801163	5.66526113706757	1.58611173506058	2.28840280182349	3.16371022343243	2.92069117469487	3.70717112509129	3.87868575380481	11.0704420648777	10.869606684461	0.203380363841983	0.645784574057655	1.11600894159193	1.54612806465497	1.42697882415262	1.89826751199122	2.45634144170949	2.80558192238301	3.36751309731179	3.64552882223091	4.63815758415125	4.85103028687909	5.91889866336709	6.08680999787721	7.41084554186217	7.54842158645244	8.92739413506157	9.04494036140361	10.5571418282246	10.6636631296517	12.1940583616674	12.2943258998187	13.8719450604024	13.9742999488394	5.77276511892242e-15	4.89835363414465e-15	0.00131386664510232	0.00848064199791736	0.025035220516904	0.225944996192681	0.0288942852724138	0.312261235166908	0.037504926951848	0.413772343997567	0.0541258910978227
HC063AM	0	0	2.04886164136531	2.87565382957126	3.57606303415854	4.64535813450709	1.18867608512153	2.52408393132305	2.84137025742593	3.42410249148345	2.83958215415464	3.55441645391678	14.6296355207554	13.9023104292864	0.202847261958653	0.885655069475844	1.02948426922369	1.920209282403	1.42722642513653	2.43596464048591	2.41346644967574	3.2334487744528	3.32454170395836	4.02916617079832	4.50425839725805	5.05759108752997	5.69316247129743	6.11640975298949	7.04136216662546	7.3149430749548	8.41339387567547	8.53638789140062	9.87332007493099	9.82771821407199	11.3393029248099	11.1297050883525	12.8332611997055	12.4588988677355	3.26556908942977e-15	5.16331808962007e-15	0.0013304202416615	0.0105848521436005	0.0225705292161519	0.275885482715727	0.0282187878911359	0.417429677684219	0.0376424815422148	0.551606138966985	0.0533835481605842
HC064AM	0	0	4.13257578167403	4.23255098741347	6.60395912244924	7.12984659183445	2.06513690833921	3.04211107344166	4.40959615998306	4.43211481284147	6.46737662966431	5.38148518964921	9.67483679576721	9.85494937585771	0.306714581088161	0.715015167189028	1.71155554661747	2.10531992840534	2.28235425594104	2.73024511182086	3.96979512036816	4.30662134441242	5.52229398950084	5.80513580782707	7.56771532468227	7.7933586238928	9.6050409327891	9.78102436130429	11.8835293085821	12.0118526338732	14.1443244290347	14.2211825893166	16.5018474813063	16.5356564255217	18.80777813706	18.80420495804	21.1202464790575	21.0953838234817	4.61821209513793e-15	5.29082662533255e-15	0.00188780252046016	0.00979450543503612	0.043168072090032	0.182926416513879	0.0467387133431235	0.285056227923294	0.0593688100891166	0.407775113176269	0.0809997247546265
HC066AM	0	0	2.1764536641787	3.12282133157453	5.73339567015813	6.06622252883249	1.87176217045096	2.82336968533293	3.13990006940021	3.89633836022282	4.07818132567709	4.93619994493411	7.15226680241852	6.34816783957474	0.216199909471942	0.912462253016725	1.17881075007053	1.80559877705846	1.48835114827783	2.14654562890105	2.53397735826941	3.0910523231617	3.4265155926508	3.96624851971907	4.68136726508315	5.20191233841204	5.92198611040213	6.43423838888279	7.36881463427583	7.87034897356789	8.81692139010145	9.31000827861557	10.3800428754826	10.8625970373522	11.9377563601912	12.4053635704203	13.5573947521639	14.0035103397701	5.03257995563588e-15	4.47156463343072e-15	0.0020869773200343	0.00876912338969662	0.026941690893161	0.341186251007924	0.0316878650599661	0.523863399367453	0.0438462096403089	0.64605447779303	0.0638068706663457
HC067AM	0	0	2.39847951550107	3.31139186934049	5.52800968924821	5.93614976613063	1.76629350944846	2.8467626922201	3.6005702060842	4.40816368411287	4.24394592969876	4.93823156297071	11.8783041574475	12.6207632147444	0.279621252098975	0.903187777475568	1.33902262735979	2.01408328572269	1.99507196394714	2.69706767344087	3.30246801595341	3.94203413751812	4.53148669908061	5.17082350578496	6.01501520418022	6.66836380320924	7.46729189890508	8.15745197617958	9.03310535710092	9.77241835153498	10.5704846323763	11.3621067306167	12.1489180770139	12.9970579134747	13.6928560451884	14.5912991359689	15.2323185248969	16.1826361775616	4.3199418498654e-15	3.99948899445401e-15	0.00263543063324244	0.00871607618440797	0.039547532319499	0.363657625715677	0.0435069098332582	0.493290713341676	0.0547397316299138	0.605245332363991	0.0754466000666837
HC068AM	0	0	2.3081290636656	2.66248082075392	4.11894447974226	5.00030842193447	1.55721559795923	2.22984073388454	2.29776654108509	2.78079277376584	2.82045578910307	3.45819568879439	10.7330207793642	9.79668801168522	0.225876406815943	0.690855266134956	1.30408257558303	1.74234635072573	1.56444570409258	2.05010792003061	2.74850122853624	3.12883822106272	3.75049094523371	4.09131111904024	5.23026033996888	5.50679489006565	6.70868054764225	6.92941880286919	8.47422910250693	8.64165275324538	10.2621041693548	10.3837617004497	12.2138163896114	12.305259383268	14.1685605009008	14.2417599496828	16.2018772474071	16.2686396140858	3.65101723459352e-15	5.03257995563588e-15	0.00211062611781899	0.00782991402074271	0.027360963556626	0.219018319055968	0.0321958471867562	0.304250687907187	0.0425114545889608	0.423198636547483	0.0598153871517607
HC069AM	0	0	2.84414564653239	3.21103512507631	4.24488156663287	5.42971925533035	1.62476292798496	2.38218933014618	2.63530980100277	3.04777574897787	2.75278964025129	3.66622534222723	9.56795620257981	9.56492348940545	0.20237883698608	0.657100605412097	1.20499511908053	1.70045885342037	1.46394428024963	2.09633264464015	2.58657925163147	3.17692290145412	3.54991675682068	4.14423890320322	4.93981472407689	5.49299163199763	6.32434201838941	6.83993523579356	7.95858693743822	8.44747396295658	9.60969161680665	10.0881966393523	11.4010247183438	11.8878032231214	13.1925990645349	13.7066688057539	15.0468791934163	15.6015871785512	5.03257995563588e-15	4.76034406743969e-15	0.00244622721264542	0.00704602173410643	0.0259923830473058	0.183707690596091	0.0303520125170629	0.28512861680639	0.0414169407434772	0.399024592962001	0.0611409762976196
HC071AM	0	0	2.12973124965974	2.89372534208769	5.97965902489075	5.33004265114313	1.51434303904852	2.473647061564	2.92919611505146	3.27433319949368	3.84693639561559	3.80080403685185	10.2418056337638	11.2061888015338	0.234204240355005	0.699306491688422	1.29856232725291	1.77269506064434	1.7005458273066	2.16518602695986	2.95251815578023	3.21190849456738	4.07855960175379	4.21344911626552	5.59543637096323	5.63410116601575	7.10627724980298	7.08527983193458	8.83118118950978	8.76878440727567	10.5578055294934	10.4748392595198	12.3910127075013	12.3073673074811	14.2035349844148	14.1507301088831	16.0493688384656	16.0492540386759	2.8280657892594e-15	3.82921918046341e-15	0.00193156405659446	0.00722588411517804	0.0371330042320622	0.213969879983445	0.0412625710278205	0.304510345883424	0.0503322809569586	0.419495307892035	0.0645109954829412
HC074AM	0	0	2.12763444650362	3.0941806452659	4.76139770444433	6.48016393269274	1.34620767324031	2.63364919583231	2.33471504847514	3.21953259283308	2.87903807118503	3.76921784992827	12.1175598896474	12.7786716071408	0.248072143302035	0.805893238446476	1.41058680628171	2.00713219881824	1.67593247285645	2.41682825736503	2.93855041867323	3.52160110055365	3.98245787658946	4.49556137189019	5.53341910300014	5.9600489925887	7.06979159759617	7.458365904347	8.92162300600983	9.2866640754655	10.8151603131164	11.1784360607878	12.9094373070891	13.2727602529792	15.0375548241557	15.3967742782357	17.2736038578691	17.6157830401956	4.16280012749695e-15	5.29082662533255e-15	0.00241780861174164	0.00610819315979576	0.028480308308424	0.276893204819257	0.0317898722049739	0.385526723562155	0.0397303674183634	0.506501848035119	0.0565281751032112
HC076AM	0	0	2.28041617666935	2.83107204837032	5.415732098758	5.54101383625728	1.56125735537653	2.34324875250677	3.59307914835508	3.50185702987744	4.53827851969685	4.70623713598708	8.59932429173499	7.88040595899385	0.26032916932856	0.643231956695698	1.45071474834104	1.82351134777768	1.88874882093956	2.25613689569395	3.28732413329441	3.53500924916187	4.54905049729896	4.74646384310215	6.26345346925652	6.41501777291159	7.97471970814241	8.10024349440517	9.92701235032205	10.0341248061344	11.8785007500982	11.9701447124328	13.9425610430623	14.0115440763824	15.9804171558557	16.0190295612231	18.0477809736201	18.0481476904247	5.29082662533255e-15	5.88708839775464e-15	0.00179065622790139	0.00798250138893813	0.0331794693241541	0.146567900755734	0.0361987966242812	0.234362873161427	0.0459625469338896	0.346042489624317	0.06248598003899
HC081AM	0	0	2.76156727707026	4.13341427083083	7.81013822721737	8.99921905635116	1.82735921853103	2.94743656743743	3.44100727637925	3.84356239583853	4.70354100865197	5.22887532376386	12.2659580484637	13.4021372957505	0.289631034142904	0.768853291952	1.71935633628493	2.15337527429597	2.08209983357171	2.61549404292598	3.68086958564391	4.06776294944782	5.04677585857954	5.36712765508919	7.01085263516587	7.25033962157828	8.96295271564295	9.15161974921835	11.2682547839385	11.4151760873381	13.6053841058335	13.7363665646968	16.1531366282092	16.281306723452	18.7135052116869	18.8524084128168	21.3760270954737	21.5187909814933	4.89835363414465e-15	4.76034406743969e-15	0.00192999996528433	0.0100102621587118	0.0346026929132408	0.265870212270998	0.039619848424359	0.36370404124387	0.0494388654230265	0.473981849034436	0.065614929681516
HC083AM	0	0	2.33252808645417	2.41599346462102	4.79460471828568	5.5958998740419	1.59384617388519	2.21443184786847	3.08203613853926	3.66391525271325	3.74633761478719	3.9913181378546	10.6885164469447	11.2731570890368	0.22105563053762	0.709598581590499	1.26242227175878	1.8518458565392	1.64618021319265	2.38272536066108	2.89295472682301	3.62248419845718	4.04136587957819	4.84491501707614	5.58589349861363	6.47902458777192	7.13346955741974	8.1304316110052	8.88141903343262	9.97659046624756	10.6309309878835	11.8172813199702	12.4725165558373	13.7344184978676	14.2927084324719	15.6166950772521	16.1368852517624	17.5102683662513	6.10932035274277e-15	4.47156463343072e-15	0.00157894742424989	0.00941875589932932	0.0322178497326766	0.240118266424547	0.0339025882896453	0.33779270380835	0.0415256081030831	0.439159382650664	0.056332086791902
HC087AM	0	0	1.70332960576816	2.39180118151616	5.5320315695069	6.09265704513619	1.34019910563033	2.20741849827415	2.16543370917119	2.94058017907472	3.77061680173846	3.97326630676109	7.23533902518605	7.44113174244635	0.211162274241285	0.627216786982569	1.17923391109064	1.54242657084818	1.40248227192753	1.82501155429401	2.43920520642656	2.73141782915394	3.29690413496481	3.51343970996804	4.57455551335859	4.66847919449364	5.83549759066153	5.83007904494481	7.34237940643279	7.23783213700188	8.85963723248575	8.67067954358348	10.5178385116127	10.2461150742409	12.1785011092215	11.8273812273306	13.9110065275944	13.4777440863888	4.47156463343072e-15	3.26556908942977e-15	0.00185680393961715	0.00554641306370939	0.0236137705578081	0.216800842917495	0.0284698577664611	0.295730135935855	0.0368084851172872	0.392382858082782	0.0513038189805081
HC089AM	0	0	2.62817167189192	3.45346610964718	5.14535281827703	6.31596878122889	1.36536575929751	2.57908692545345	3.57066946579871	4.55172393653203	3.89531143524524	5.18248977431536	15.429087435451	15.2344084869352	0.259096370285362	0.848706106062403	1.35743253661382	2.04642945893605	1.95561714309683	2.86098613470778	3.33599305361667	4.3845747395708	4.64514036799612	5.87174960819939	6.27225622161805	7.60427851681465	7.89597013322333	9.29532616640225	9.66923393861627	11.0840869710621	11.4292598196461	12.824315269297	13.2391193036431	14.5827516641237	15.0100577689662	16.2871668558037	16.7678548857416	17.9703479710031	5.03257995563588e-15	4.3199418498654e-15	0.00370150431077505	0.00870290333319408	0.0401746632706668	0.35916620978893	0.0432936708053356	0.462829226884963	0.0494532551292791	0.568259367452324	0.0632111202842063
HC090AM	0	0	3.19287155339032	3.48151104975476	4.51399965799786	5.70779155852434	1.79526942462157	2.10644815134883	2.91849687218653	3.05730828337859	3.8356412364805	4.29403289215737	8.36769690780578	8.40547431339166	0.233782382100104	0.572714811979703	1.38423406680339	1.71986514802384	1.72994962943219	2.1286068424724	3.0437769168093	3.44034749908882	4.19419456455951	4.65131665288617	5.81253431666427	6.3303000739836	7.43028950437415	8.02575940676019	9.30927743585744	9.98551283011574	11.2019041033032	11.9552510258629	13.2284762173617	14.0458378177838	15.2425372964447	16.1081683365363	17.3036333682785	18.2022313821624	4.76034406743969e-15	4.89835363414465e-15	0.00147256720552548	0.00832492843129826	0.0340066921104361	0.163176956399387	0.036084569554974	0.231463666852648	0.0446476806408549	0.328422179569805	0.06061090649258
HC092AM	0	0	2.46251299124321	3.52542402785898	5.10286393155224	5.83650100711511	1.4923930435059	2.48265953551352	3.02933023713666	3.45749643705413	3.44939473655829	3.7821077471701	13.4852280137444	13.7166087406599	0.267362158384161	0.750407560507329	1.57200629053277	2.1058054726783	2.06125958354623	2.67931921041116	3.65202841694785	4.08256059636154	5.12053946522019	5.48812496935853	7.08749116155022	7.40406429370053	9.06138059948357	9.35640670521449	11.2957639663046	11.5592129224688	13.5364427664795	13.7645141537787	15.8940629271407	16.0685324877963	18.2220764337859	18.3289029364371	20.5682257471342	20.5863117548218	4.16280012749695e-15	4.16280012749695e-15	0.00174223169891789	0.00668238562517812	0.0526618902131081	0.205394135516589	0.057791842487243	0.318157272342875	0.0624043666653248	0.434496385737293	0.0724830891732374
HC093AM	0	0	2.52201479989544	2.90988722383677	4.17450849534279	4.53968470479677	1.46537271125978	2.23802477634016	3.18634809870686	3.37211721993839	3.2725246663239	3.73256132131366	11.0223368715465	11.484751727762	0.230022480732934	0.630451334680186	1.29852476265492	1.75039859009944	1.64080937915696	2.15260335752767	2.88750813348979	3.38413844293467	4.01010327274213	4.56016748792579	5.5744595975968	6.19083076466068	7.14775280633537	7.84831506060084	8.96132424101584	9.76035404230951	10.7832599518986	11.6861000602191	12.7180873825541	13.7301389558595	14.6316256070959	15.7507355393318	16.5750740668738	17.7963447455404	5.03257995563588e-15	4.89835363414465e-15	0.0016115618837546	0.00608269467316122	0.0324989268302558	0.188405270819959	0.0347538159408219	0.270165122944674	0.0423682769502828	0.366933483637667	0.056195240008068
HC097AM	0	0	2.63939981544858	3.01004895756276	5.46078756844933	5.53231694131388	1.75209699570111	2.47257135790987	3.18723314576534	3.64421122551758	3.59990950992642	3.92074968744432	15.5375126242894	15.0965932472792	0.296732714216148	0.724239012314367	1.5508980825975	1.99688388056565	2.18980778297493	2.65576727760017	3.73653926789494	4.07321086143907	5.20368425829731	5.46465139847904	7.06506585724174	7.26286390550904	8.93684375857373	9.09174746914653	10.9979434785592	11.1152763827579	13.0534482201387	13.1363348274438	15.1759614429416	15.2303875315239	17.2594745528236	17.2845418853677	19.3332567784989	19.3390630160244	4.89835363414465e-15	3.82921918046341e-15	0.00123851364296088	0.00934093149779019	0.0449177319061589	0.236214298384561	0.0476786243335441	0.318840984959084	0.059082876078342	0.420508202473863	0.0806644196273655
HC098AM	0	0	3.49466273884859	3.9812822128538	4.14590959609188	5.88750735268503	1.50767155931462	2.93292088678422	2.59306192908206	3.48526512029471	3.03171890536843	4.07629415054073	14.440662646737	16.3613971780999	0.317940474524902	0.817694762886322	1.85663274223946	2.35328376585303	2.43467553169488	3.0805420498091	4.28512957300434	4.97299268779374	6.00471139921902	6.80480539217136	8.3281011706294	9.23163630710133	10.6878992795811	11.7022336526644	13.3611866464424	14.4718138459704	16.0401559292242	17.2380816354747	18.8406420048522	20.1092417524708	21.5865337713408	22.9096140539756	24.3337462677679	25.6906771577938	4.76034406743969e-15	3.99948899445401e-15	0.00135649796200586	0.0107286013790101	0.0364039362442861	0.283060416916969	0.0416206982511238	0.394708214462124	0.0533930241474219	0.505521247037958	0.0736956345654261
HC099AM	0	0	2.41846518557856	3.26426332447219	5.81171610153933	6.08581692263306	1.57117256444922	2.41464640155223	3.19682873980512	3.58152471047533	3.71433178894043	3.98085679807146	15.3161178560381	15.6539106651908	0.282139863860866	0.700221474378545	1.53818333274823	2.01136374379098	2.11413148921297	2.67027252570211	3.66621008121555	4.28525946424077	5.11524502033072	5.85276727975945	6.9870476274331	7.86146064740977	8.85843826169393	9.87860407060502	10.950566542715	12.1099279555388	13.0439402277128	14.3319496867537	15.2384824287524	16.6377794990866	17.4100354569264	18.904418640591	19.6007158513879	21.1674301783038	4.61821209513793e-15	4.16280012749695e-15	0.00147545351384071	0.00577723493138097	0.0446542203112412	0.251547087049786	0.0481523983112607	0.323325042855224	0.0572199800116908	0.421240900018499	0.071559543920554
HC100AM	0	0	2.32377364365236	3.49788512383882	6.18309770291461	6.78827782788405	1.45169172035079	2.60353334515054	2.13048557716455	3.32044723168344	3.20491560530842	3.69432468415939	11.965222353125	11.6767182035037	0.253154671857593	0.807643183434877	1.5838773823024	1.9517065625366	1.84010670142253	2.24030323078839	3.29396026365749	3.55101472602577	4.49254567685162	4.67404071158859	6.28921236775206	6.37401503324859	8.0698332033406	8.07387397537577	10.2182777055914	10.1421438271722	12.4078666509115	12.2542889844972	14.8298412132744	14.6000028368522	17.2826062845898	16.9763728735636	19.8583265497406	19.4765597854811	4.3199418498654e-15	4.76034406743969e-15	0.0029268411594378	0.00949099692668656	0.0318258653986358	0.405347142420779	0.038968697011266	0.483382295399138	0.0503036719811371	0.580069929968879	0.0704588052873169
HC101AM	0	0	3.00917709910739	3.46231023832596	5.47737445594249	5.8776509246737	1.90468156275836	2.72325394005096	3.15003366267252	3.59871087953409	3.67227698566697	4.11380373919265	15.0985222210478	13.799165460976	0.314095745933045	0.719468666857837	1.65890952269089	2.11187990777307	2.35571018663149	2.82465553821212	4.04815489781371	4.37317136502578	5.66621557827406	5.93971941495906	7.72089274141423	7.9599920219643	9.77779047406048	9.99370928109318	12.0278060222478	12.2085904886226	14.2409149180841	14.3841422958314	16.5008481665717	16.5947960590572	18.6883210319688	18.7299464991302	20.8429177765036	20.8251143403323	5.53704178680165e-15	5.29082662533255e-15	0.00147722376545182	0.0101010273781314	0.0431400964571709	0.249901550590227	0.0487680566607031	0.313545330231564	0.0584267400625461	0.399928606654258	0.0745077310732952
HC102AM	0	0	2.14403401115382	2.72368205653951	3.78596523755923	4.45416518701561	1.02522955808465	2.0156435793598	2.3884076742891	2.6456238367421	2.47814246731066	3.30114780201279	11.9818414846373	11.8715718821055	0.205254761034379	0.584583621034565	0.93472073700828	1.35518397992025	1.27425562547902	1.70566068957355	2.07714497825843	2.42367829759203	2.79893541672476	3.11965415308507	3.75981354837993	4.04536617763701	4.72605016797768	4.99118543756418	5.84134715216903	6.07074378708455	6.98059757923996	7.1775674911702	8.21301832792113	8.36890779272872	9.46212522056784	9.58078186609696	10.7573921833748	10.8398605206171	3.65101723459352e-15	4.76034406743969e-15	0.00159169415413767	0.00847021085330993	0.0214050637210066	0.17888215267139	0.0273054709263444	0.258039503236984	0.0385291998569648	0.356012087979466	0.0574748180136142
HC104AM	0	0	3.11224078029998	3.8513314165532	4.72371086890459	5.29824124868423	1.92596786439261	2.63660704913322	2.54832247113309	3.14789142623916	3.57370640449935	3.98612924511241	13.8262306623082	13.1481822533331	0.253283779850757	0.630180225977729	1.44776003382248	1.94659528094018	1.92282039226273	2.61555756771774	3.36062222386906	4.0690162266857	4.69057122785104	5.46330535334417	6.46850212963086	7.29007632063935	8.26042560939821	9.14020377601907	10.2925761494784	11.2235479969328	12.3340967132599	13.3117579575064	14.4866409236347	15.4947189695292	16.6121513587681	17.6327487988944	18.7553332098429	19.7619428822872	4.61821209513793e-15	3.99948899445401e-15	0.0014056853611308	0.0084763658943587	0.0332292936317615	0.132293714203963	0.0391321150059625	0.220656308860075	0.0484935121884966	0.330173840883233	0.0656026339571815
HC106AM	0	0	2.15102614558951	2.24438406544731	6.58771707543984	6.41475232123952	1.54069556676161	1.85145458795594	2.03416101862002	3.20730128593528	4.07998131510339	4.46783690743107	11.2532723419836	11.3649471106236	0.221177437266946	0.630395772860716	1.21305478066168	1.61585425964043	1.50103215416789	1.92717499582455	2.58130441303883	2.9094251626748	3.48153598852998	3.7716598134281	4.77060855331999	5.07147662313754	6.04510676815752	6.39327038029131	7.56782100610252	7.98840720577618	9.12193173534383	9.62332442809605	10.833938354026	11.4223962808368	12.5713863791622	13.241586913748	14.3934060704366	15.1434030258137	4.89835363414465e-15	5.03257995563588e-15	0.00212164592859894	0.00822097721543275	0.0246235294804971	0.18223326076741	0.0281306282005311	0.276845709300194	0.0366459692574824	0.384821073470659	0.0515560011898806
HC108AM	0	0	2.8455036801969	3.4709400848974	6.21251318343694	6.09967944758376	1.76684776754084	2.51756212703087	2.78816406025661	3.19082067305444	3.75158648661149	3.66252872600124	10.2226739209468	10.3194709279264	0.250094923053673	0.704943427593756	1.61236711161123	1.96427592107319	1.90526189061006	2.33876644842903	3.43465348792019	3.71628305527801	4.73074989705172	4.93885745102964	6.63632290265732	6.7316292713532	8.53174267104897	8.53790796064722	10.7849862609904	10.6999435738626	13.0626417729454	12.9013385331268	15.5429608882248	15.3081559822239	18.0223192175391	17.7189826777295	20.5908744983036	20.2185076660398	5.29082662533255e-15	4.16280012749695e-15	0.00244981554433748	0.0106021044693426	0.0378546595970948	0.25372654751525	0.0401854195050937	0.350188540551606	0.0466649942323698	0.44315535055937	0.0599968776716211
HC111AM	0	0	2.24594605679774	3.2439505577344	4.40995787889824	5.0609431988139	1.34980624187605	2.26896957309951	2.50984941621928	3.3850497865252	3.44300452326082	4.56755207867468	10.6333727210766	10.3287300778832	0.208639502801642	0.786472193229548	1.16888028816312	1.72612583894262	1.54292935877818	2.19166516262774	2.70422996060949	3.29609202141699	3.78267660096089	4.39035864027237	5.21670966793943	5.82839750771311	6.65850488952591	7.28472344365258	8.28073658367984	8.91067756915544	9.90661948492677	10.5325986608325	11.6115945118329	12.2234974061213	13.2945556443082	13.8830672675231	14.9895310001847	15.5456957944561	5.77276511892242e-15	5.53704178680165e-15	0.00132614352187013	0.00812228071640462	0.0318196488836985	0.336853807364113	0.034589147417684	0.44862263140558	0.0407449707632275	0.552168317243285	0.0548890741468221
HC112AM	0	0	3.69184564588579	4.11543807799545	6.40684329352499	6.29282389112664	1.87784821392704	2.00348900561523	3.01900602097223	3.4274844927479	3.51678239029886	3.66437932989047	12.1659014158033	11.6604080640691	0.261855329961354	0.635753634734133	1.63511645277546	1.95645958178195	2.02858363464223	2.42115911252067	3.59870711450581	3.92573850509263	4.95623478048749	5.28786290394846	6.85410170880168	7.18811167506962	8.72841499167088	9.08081109322991	10.9256380585003	11.291972196318	13.156616450787	13.5336135930036	15.5955985319563	15.9701388376717	18.0585484635971	18.4190746869941	20.6221662698415	20.9602355762757	3.46365907135345e-15	4.89835363414465e-15	0.00307197854538445	0.00563935720328459	0.0390689455722488	0.171729758725416	0.0439145506317903	0.268074528677242	0.0535663292187561	0.368926532242697	0.0691228435663761
HC113AM	0	0	2.32149101318914	3.00313471651581	5.71015032483247	5.96688088976243	1.45284903108282	2.59915565125609	3.92575919794596	4.82774065626099	4.13704792913007	5.00580774802744	9.63463284499703	9.25546821853701	0.240158830490633	0.784021660934832	1.20828749457735	1.80384650699919	1.75689551850062	2.43275971784508	2.95033614180762	3.5862096858309	4.0731352700099	4.69224556232591	5.44557474517172	6.01469386291625	6.78564025495145	7.31761233560888	8.23000307523616	8.72163121841739	9.64282216942693	10.1005826192964	11.0982420207722	11.5143813730362	12.5219030256291	12.890386676808	13.9556164825476	14.264983181123	6.3237473496256e-15	4.61821209513793e-15	0.0015227580325393	0.00750778280833622	0.0309183421629108	0.305147388558585	0.0352216270640711	0.406873948216768	0.0452032399743809	0.505367060854477	0.0633777899981007
HC116AM	0	0	2.6682144693802	3.91830714978789	4.75100315158988	5.82757815351434	1.50443924825985	2.1234946470724	3.2955240951127	3.71993023091782	3.45081892696201	3.99329026125809	17.211635552973	17.0420295107202	0.296646459975907	0.718377610455	1.71248494164085	2.18644635833959	2.34132889945712	2.91886332493947	4.10818934876352	4.70722557486944	5.77622643418808	6.48293989928669	7.95218235026419	8.78386368367953	10.1425380134514	11.1126017293066	12.5838731790487	13.6697636392468	15.0159229722631	16.1892616180366	17.5399954458964	18.7589289910981	20.0124483645559	21.2457143758934	22.477210317346	23.6930308423273	3.65101723459352e-15	4.76034406743969e-15	0.0017921365824198	0.00866381337686551	0.0479053354010598	0.180979252246677	0.0521722097712794	0.286998849889648	0.0622891845693219	0.410684096393067	0.0774652711322391
HC119AM	0	0	2.45711787676116	3.74985012045732	5.44787429075865	7.24153110589654	1.8243263282525	3.35308014951537	3.87040789631927	5.1408260718269	4.98112977478798	6.3862527360559	12.1527756558054	12.3558812227043	0.251694606039115	0.736337484375423	1.36165363549878	1.95411319144387	1.8779367610661	2.66172681952439	3.2355712372293	4.12908885219608	4.50538041890147	5.56359161222168	6.13352000476345	7.2948966999705	7.75152893996031	8.97697431879967	9.53525058097672	10.7602702365987	11.3039766391233	12.4891279558176	13.1379995223034	14.2551397407824	14.9425528589188	15.9798687702832	16.7549993542867	17.7117460232064	5.16331808962007e-15	4.61821209513793e-15	0.00209931330412023	0.00440765216470527	0.029408473920438	0.215164067706491	0.0329420541513227	0.311965773330777	0.0420988420531098	0.433946390154396	0.0589655812260441
HC120AM	0	0	2.39797066830562	3.03298259077294	5.34491844865179	5.95426242448781	1.63831281636718	2.6080840559036	2.61066831074172	3.72595027228198	2.82526763476543	3.62328838015721	17.294080303758	17.4176055557911	0.247232463576395	0.808511983683831	1.3716615309706	2.11112622773904	1.76609569372489	2.69773801019328	3.03939049648713	3.77501821621	4.17576839041486	4.77454991724795	5.76096143515819	6.19666644713142	7.36492043691864	7.67471190014098	9.2398604188675	9.44591302375376	11.1512061116802	11.2739537843452	13.2209568645768	13.2787691481792	15.3061273949976	15.3100682979846	17.4609100415551	17.4195478355418	5.41533369831054e-15	5.03257995563588e-15	0.00256929653581294	0.00842167115100352	0.0307673234515923	0.237854297553561	0.0366221706839967	0.336682698522041	0.0495018452457797	0.459547984856741	0.0695754342824802
HC121AM	0	0	2.22214401172046	3.3311070404629	5.40331298528818	4.72762724165198	1.32801934605459	2.39496531252933	2.67816726933972	3.31917953233377	3.40478525175662	3.44627067154428	11.9216783740637	11.7474691171743	0.220413964235723	0.673176466835009	1.29092717711752	1.75820497109174	1.64186785590123	2.18038460423166	2.90119249074529	3.29462557571448	4.03767209553407	4.37008504808054	5.61199791139277	5.88744640405385	7.19512289410656	7.45218858619519	9.01877743099085	9.24481977963011	10.8524120898338	11.0584910972096	12.8049652198762	12.9812369715627	14.7407632047584	14.8935833061133	16.7114190536306	16.8369687394106	4.47156463343072e-15	4.3199418498654e-15	0.00116593917277276	0.0082481571613146	0.031236097589206	0.186265381361706	0.0342291776233245	0.277336983420583	0.0424230640107493	0.390211755424463	0.0575158842587525
HC122AM	0	0	2.60925965196958	4.05490244817552	4.04196658918391	5.99552033924003	1.42586618577027	3.13530715351895	2.52365310918838	3.66341187875395	3.30590887254054	5.05640492569337	8.83162307700051	8.04310366993432	0.24052944971905	0.723885867259582	1.37405911842923	1.88384661241224	1.71053018938619	2.40584851385752	2.97599568740503	3.69094390084777	4.07873697374499	4.86339593063535	5.64657638207605	6.45815206553125	7.22379914551759	8.06399023169728	9.07334782231991	9.92661908410251	10.9476185048016	11.7981077127369	12.9651783490759	13.7919373233654	14.9776983495748	15.7595694771281	17.041399771612	17.7550042348712	4.3199418498654e-15	5.41533369831054e-15	0.00311780274987256	0.00481868221946185	0.0292224537924322	0.272723597646058	0.0339506620805525	0.364204211936997	0.0439546714365587	0.462906941241565	0.0605725923776829
HC123AM	0	0	2.26272417880656	2.73284859860898	5.46936013866588	5.78494299383573	1.71002741321893	2.40260056309191	3.16974511178742	3.77690818229583	4.206964959058	5.03638903509145	9.4695879319805	9.08588421043363	0.221253686157643	0.731509427190858	1.19831716756257	1.71959773401245	1.57510296428257	2.14331960593956	2.72886255370241	3.20423946955001	3.78925535856309	4.26230044144479	5.21188268960238	5.71714106842189	6.6314475210138	7.19370034527029	8.23176784971318	8.85601675417062	9.82643173528216	10.5086371848565	11.5034432528989	12.2332517149227	13.1586277167212	13.9215619552451	14.8362484935401	15.6214392444547	4.89835363414465e-15	4.47156463343072e-15	0.00124322314560185	0.00707967895926893	0.0251438261979303	0.217531968128685	0.029175642228192	0.337071067780594	0.0392759198149379	0.465520540673623	0.0574072724387893
HC124AM	0	0	1.82027058653882	2.46585032467954	4.04524617054221	4.36951990498913	1.26261914737638	2.13465457815998	2.24310956164861	2.6417395061584	2.62350254757089	2.93196005632503	9.78243495101407	10.9730525046701	0.207268792244964	0.649899723046486	1.04808362944823	1.50350004860938	1.35616708848355	1.88351078211681	2.26844840640381	2.70571131398745	3.04832982614997	3.44205605977544	4.13689200741456	4.49667053889406	5.22359697955063	5.57877905482793	6.50707554094691	6.88123998224362	7.81539693275362	8.23529584479543	9.23867991542255	9.72678658467703	10.6719409776485	11.2457671541765	12.1573016779336	12.8271373768685	3.65101723459352e-15	3.26556908942977e-15	0.00250326670348038	0.0085497419540369	0.0201642154551797	0.224723346956125	0.0252435988252805	0.339478698472538	0.0357979628561843	0.431250031397088	0.0539604282508381
HC125AM	0	0	3.66764981797377	3.7783276421234	5.23380391596703	5.5256364960128	1.61918506505735	2.0591516027401	3.22679990879853	3.04692685954931	3.94704596947884	3.66122818709953	8.9076956414567	9.74185513979144	0.237240393200708	0.592067680698058	1.37375695714776	1.71209466747905	1.72538808896657	2.16245665283546	3.03675038160918	3.45879135970724	4.17611018432497	4.62570826253198	5.76404568842792	6.2361123618349	7.33287541732049	7.8468463946392	9.16405866343488	9.72280641048454	11.0059343350722	11.6246242042206	12.9924196630735	13.6774990120656	14.9674215128694	15.7281211128251	16.9984413418886	17.8376056545728	4.16280012749695e-15	4.89835363414465e-15	0.00243595283928026	0.00574527230322226	0.028280665232169	0.251641310120609	0.0319260278956812	0.30722946078441	0.0401011649938448	0.382538866977282	0.0559222531814385
HC126AM	0	0	2.24605566411839	2.83136190370704	4.958964769826	5.8499316795714	1.44585029345911	2.59885370814876	3.20350038502012	3.86947856422322	4.2700656577213	4.58788262802378	10.5268867433373	10.1926328719519	0.193634034586922	0.727196746021452	1.01789532703864	1.64025462079311	1.35445992976667	2.10276149347437	2.31744414689104	3.06953628917778	3.20189609693371	3.99705526093672	4.38317090908246	5.19469499068632	5.56689715598126	6.39453452758566	6.90596396037294	7.75049087126075	8.25131976072486	9.11278271286001	9.6705040181011	10.5473094893857	11.0818092926295	11.9663438389272	12.5108835137089	13.400074826168	4.76034406743969e-15	5.53704178680165e-15	0.000936577652056589	0.00778029283600684	0.0266184870152205	0.187485471981735	0.0300498563636847	0.302787401454002	0.0378052480616651	0.441279437932335	0.0525013936132312
HC128AM	0	0	2.8714795022223	3.67246080143743	5.30141488381967	5.40546298697485	1.87025651414639	2.48404448847343	3.46135996051571	3.62159786301822	4.16454774776627	4.82624441909545	8.77353148421353	8.60961015390295	0.235178291770091	0.656387072673074	1.27083136826122	1.76455197780768	1.65438220985232	2.22876425937764	2.87016552027345	3.44255832418607	3.96744422133613	4.59739065051701	5.45221027133894	6.1682550333532	6.93721359084124	7.75888803790478	8.63379794794281	9.57771576607462	10.3336195981473	11.4028933911119	12.1334560658082	13.3263073396435	13.9110719699513	15.2156525966241	15.7122058985778	17.1222734214539	3.46365907135345e-15	4.76034406743969e-15	0.00174536563623238	0.00744150203493196	0.0277688320911111	0.247946867697033	0.0311357324385638	0.318553227174452	0.0401153330620878	0.398170589909723	0.0551140873061213
HC130AM	0	0	1.93833285042727	2.63200414927327	4.36872381083504	5.30343069528575	1.31056852464738	2.36467384643082	2.3367016200534	3.72089274151569	2.98217476175998	3.9921940036118	9.55792577820966	9.86516507467633	0.198190479063445	0.578274238448693	1.04184929001186	1.53088527310049	1.35777741097633	2.03459731876103	2.32066931996317	3.04546665267465	3.18133991972758	3.97541114911833	4.35070295855581	5.15926257084952	5.51785275504893	6.34037405900312	6.86066391521642	7.67649953639721	8.220045738809	9.02142157946265	9.6788260204141	10.4503936703936	11.1424487885884	11.8776551368584	12.6488801214465	13.3385073248371	4.3199418498654e-15	3.65101723459352e-15	0.000939198352224726	0.00811432950661834	0.0235286589872182	0.146872211586044	0.0263705399423769	0.223914491795294	0.0345664329655501	0.325599967907158	0.0495461923254676
HC131AM	0	0	3.06055476642971	3.07993363984611	5.86567750659644	6.16816900565464	1.71994370771837	2.33105074616714	3.5376612660239	3.55357542750883	5.15640525750264	4.98000690096188	11.1496722091192	10.6380900574951	0.278412898964879	0.679352491579552	1.51158382931821	1.9166670272581	2.11417711572634	2.57466301269351	3.6667075882051	4.04785912038203	5.13617157845102	5.49411774396465	6.99908076631347	7.31823956444308	8.83427396758131	9.11880334230839	10.8323600601298	11.0640611859617	12.7803476491825	12.9621642565441	14.7732150153288	14.8989074973804	16.6993686659835	16.7789762990136	18.6109206150699	18.6485871079938	4.47156463343072e-15	4.61821209513793e-15	0.00139692129355377	0.0061107519845586	0.0499037740419638	0.185480543270856	0.0523224107187353	0.282383187361636	0.058688894225479	0.387960171727152	0.0722071492349429
HC133AM	0	0	2.21682458739887	3.32737378494754	6.23651167758844	6.67571675040893	1.3013841631091	2.81131137437767	3.99161583026752	4.61492055602764	4.75438918941407	5.23158652588163	13.157200437784	11.5021205941001	0.264745233546919	0.652037933913084	1.51609923089972	2.01410600996361	2.04041160452283	2.71173140349919	3.56642157925795	4.34486920913326	4.97099654038765	5.91446555788759	6.8074353238848	7.88102084004791	8.62893838463934	9.80940382157974	10.671187914255	11.9185210095322	12.7037881103371	13.9917712692108	14.8434081835632	16.1385623301594	16.9554275980188	18.2351107536632	19.0994538251455	20.3364756740248	5.03257995563588e-15	4.61821209513793e-15	0.0011554439639222	0.00575886873520274	0.0348069825975154	0.175080421703108	0.0380524657748601	0.250001096900381	0.046174640750322	0.354213432553727	0.0595801543029307
HC134AM	0	0	2.81880052523333	3.93363878426329	6.06712849452904	5.84811962855713	1.49651140783306	2.69017345911605	3.06353823011576	9.67892444858627	4.04149575844768	3.900117452744	20.3384564339022	19.6494401934209	0.291477501560921	0.748511517729945	1.55587642985466	2.13690460001443	2.19948285991476	2.87474720449848	3.79472908671506	4.43503411361954	5.31028485043042	6.00109673234467	7.22555431532369	7.99282822304249	9.13272409544472	10.0098866981972	11.2194776902801	12.2068069070214	13.2869661933376	14.3765758347033	15.4208732141294	16.5817820291822	17.5191141579001	18.7199925629084	19.6156904460482	20.8190475329317	4.16280012749695e-15	4.47156463343072e-15	0.00146130767366384	0.0095690336610182	0.0379370999645609	0.189394070787559	0.0430742067227464	0.279224786790929	0.0522421579069445	0.404379815483516	0.0679948779935972
HC137AM	0	0	3.14976940837328	3.7969842727764	5.64801601819485	5.52162964696826	1.68384338292529	2.27196875447598	3.62824881676229	3.76144417892769	4.30433764266383	4.41924781076641	13.0931653461342	12.7080640613494	0.28482865700903	0.601187576513627	1.62844407708978	1.94976910213435	2.17168942100586	2.53320224972996	3.81249768557173	4.1569504223736	5.34360433135824	5.728322525198	7.38055627966342	7.80943823500981	9.42619985253088	9.90209021528651	11.720701859421	12.2403776389164	13.9989634421543	14.5656473091264	16.3686658142101	16.9799992422647	18.6842057630898	19.3372991488358	20.9992822402194	21.6921308454178	3.65101723459352e-15	5.16331808962007e-15	0.00270915607107489	0.00731620624616568	0.0418100627249428	0.173030618372595	0.0456566494662346	0.245990219039008	0.0523798502409665	0.332528882379259	0.0671146981209891
HC138AM	0	0	2.71759923980569	3.07110936089065	5.70845289554271	6.05172252457992	1.96427700363738	2.32399787538636	3.57927406012843	3.51342704814675	4.6621707370575	4.36504382757754	9.12500939236706	8.96696269602731	0.224977640642418	0.569916553883757	1.27706994372423	1.6670471505455	1.69127011671712	2.15156454550571	2.95273988655295	3.36522835290364	4.11222455593067	4.55214607872672	5.66636658327911	6.12794552660126	7.2203596768056	7.71358382866763	8.96912410381349	9.47782857062767	10.7039242024941	11.2275015664592	12.5120444650888	13.0454677356087	14.2811438852287	14.8272904625694	16.0541152366425	16.6139471388174	3.46365907135345e-15	4.47156463343072e-15	0.00241380458566027	0.00512869484582185	0.0330081148837488	0.132788089695285	0.0360636420390743	0.205889439150078	0.0439899918180678	0.306783429295814	0.0579968221033508
HC139AM	0	0	2.30819886806139	3.37115481209306	4.91853529253519	5.56976607247374	1.50651740873372	2.85760135344913	3.03033072831628	3.89421973212794	3.6986315903051	4.41039438811611	12.3992926242237	12.648760729729	0.241897111303881	0.953327535470307	1.20078474278243	2.03176563574296	1.72231166852187	2.60623550962475	2.90516097918405	3.76185983274554	4.02766968232705	4.96346699951868	5.42920581704518	6.45896715669577	6.82188747878522	7.96097555411423	8.3418679231357	9.56327999915028	9.85089883718092	11.1359904689235	11.4063092513587	12.7238786833181	12.9371181288428	14.2618616677037	14.4623004070691	15.7666096598837	3.65101723459352e-15	5.41533369831054e-15	0.0022700491389919	0.00887574272113472	0.0321980611494138	0.367629387565761	0.0361280312686421	0.49269378807419	0.0455133217028172	0.62857678640933	0.0616755387182627
HC140AM	0	0	2.98595584425154	3.8407678717007	5.50404162247409	6.04432000033909	1.5501430780083	2.29062070388077	2.81325298958625	3.43983285598378	3.56984314192466	4.1969829623873	8.46428916572571	9.34932554899249	0.225486314245824	0.577149051182023	1.3645006509425	1.79649477712905	1.69302946459364	2.2677962532715	3.01994982244712	3.69832198154427	4.18250970046519	5.03454242400494	5.81704208403997	6.86208617540814	7.43998046019304	8.70234627807032	9.33081956565979	10.8133672944819	11.2251799501927	12.9266041099317	13.2572610356192	15.158234165434	15.2667491494272	17.3463771709353	17.3238262784005	19.5509101412625	4.16280012749695e-15	4.3199418498654e-15	0.00211183806253121	0.00563503069539001	0.0335307311868771	0.221653262747711	0.0382706676499946	0.276131775500672	0.0426210443752333	0.348837341022688	0.0503347586685601
HC141AM	0	0	3.48523535164333	3.91889040598763	5.47487520402343	5.77758318819705	2.14416973153075	2.75317057522237	3.496630881644	3.59690044915844	4.06840156048544	4.14358417000826	12.6921349397787	13.149238222176	0.30640625099208	0.769412445143009	1.71443508073691	2.16470410791171	2.21360754120573	2.67027595558388	3.85586366918456	4.22579188798699	5.34294996700613	5.70974633546641	7.3838185950726	7.77583063165693	9.43738161830563	9.86540002925231	11.7979307815218	12.2769195640472	14.1711971199976	14.7087352951213	16.6946806847177	17.2984676513014	19.1891493657787	19.865072162834	21.7216925274782	22.4738919383128	5.16331808962007e-15	4.3199418498654e-15	0.00195741658513437	0.009977588667048	0.0362925401584733	0.224774131649333	0.0433064220433226	0.325372467901366	0.054894404635274	0.454035191670873	0.073511734541423
HC142AM	0	0	2.7360336259429	3.11632097465219	5.28729149080239	5.55057488104006	1.62655295797316	2.4451295816146	2.8299422979263	3.21884284115935	3.26461284837152	3.53419308874009	12.4304653517277	12.4926545480357	0.248557197406115	0.707905290357946	1.4752609414227	1.87537024691396	1.80102404768853	2.24323467362647	3.17820780719697	3.46470295349181	4.36271807270851	4.58434237979181	6.07128779785656	6.22951176311594	7.7864510971684	7.90247019140568	9.81667724744514	9.89577230946765	11.8824649887952	11.9307419890482	14.1231638490911	14.1347613916862	16.3698557495671	16.3441508732906	18.6867542092323	18.6237457333671	4.3199418498654e-15	5.29082662533255e-15	0.00152832656340145	0.00831179611994993	0.0269787333136312	0.285491349903482	0.0320342387634421	0.360902438447535	0.0437725529397939	0.452654602403655	0.0630229316191706
HC143AM	0	0	2.63181566584964	2.81096609984542	5.83626371285749	5.8854650353517	1.87973628970425	2.43636748589277	3.10536601388689	3.27654912745986	3.84270256321558	4.07722330861117	9.82899669215622	9.66675976714711	0.218945497346846	0.662710378535374	1.14954102773226	1.59059916037161	1.5168964548689	2.00449732986365	2.60690866022228	3.0461956352815	3.59166593951201	4.03424143865875	4.91356401221863	5.32497261643475	6.22837469617826	6.61316567840567	7.73179483307637	8.07663089747151	9.2375166792366	9.54326392225885	10.8395047338498	11.1096723875569	12.4234308764471	12.6687013489875	14.038190752224	14.2678669048431	4.16280012749695e-15	4.89835363414465e-15	0.00151072512543686	0.00562991286036667	0.0301694954088204	0.230845183173947	0.0326183857622634	0.312443276242341	0.0414961343391297	0.414232529371142	0.0567780215523689
HC144AM	0	0	1.75017493294975	2.84316265462343	4.40878267657743	4.87843088336085	1.38844755847258	2.20631113722115	2.65677549243083	3.66423163611376	3.4473832398037	3.94532804471806	11.4622013852771	12.6811151113382	0.22082422735641	0.669785492721645	1.2485268715874	1.73694557062617	1.62660450066418	2.2307985529439	2.84275963004548	3.45881927960288	3.96157797924115	4.66820896588755	5.47408599689504	6.27029174919196	6.99155630557	7.88935812916968	8.70916072839015	9.69908495555456	10.4320610620125	11.5117659042361	12.2525927872015	13.4013175905021	14.0614218085941	15.271645284501	15.9008390766207	17.1533187244901	4.89835363414465e-15	5.29082662533255e-15	0.00273049212584923	0.00697464900528397	0.0345779356059574	0.215965786509587	0.0389102267962151	0.32450458073674	0.0467548792134731	0.423366551604987	0.0616156353653476
HC145AM	0	0	3.0247588843335	3.80055632586867	4.76095951404834	5.38967746302936	1.46796880273549	2.59036371322118	2.91173425160289	3.78249201873877	3.3242038635019	4.02743775386811	14.0794053395649	14.624720769685	0.297498512928915	0.745605061644832	1.62258674751709	2.09696340255989	2.1792758881886	2.6935860636829	3.78576375611647	4.24323426854479	5.29868066687606	5.76814511677375	7.30453074206686	7.77255727683592	9.32948881008129	9.80630673515665	11.5955234128331	12.0798357712758	13.8537121644129	14.3464725436489	16.1981208879934	16.6929335934425	18.4913152015377	18.9865026161226	20.7778740998281	21.2708081137481	4.16280012749695e-15	4.16280012749695e-15	0.00289135110507799	0.0150241479720495	0.0324312438883191	0.188807899686805	0.038930168461445	0.298216379685071	0.0521888488349667	0.423385483029325	0.0713088567729397
HC146AM	0	0	3.47719529685982	4.76763660726315	4.5896583381921	5.71584814331381	1.91857452856299	3.68419746477014	3.22506656742139	3.67716928559426	3.7484385917427	4.06762871528326	9.94440490653798	10.699517799985	0.259469053368958	0.858929564826828	1.5561329951241	2.05867927056624	1.96629346821971	2.55902669203794	3.48734742681556	3.94991067372029	4.84536679633825	5.20934488124704	6.72005494904776	6.93314605850987	8.59574386649017	8.66318719314428	10.7549279176714	10.6990459780938	12.9272937742805	12.7830268307684	15.2377601571541	15.0543147763823	17.5271422950257	17.3378878943909	19.8553108508969	19.697594348152	5.03257995563588e-15	4.76034406743969e-15	0.00160910661910783	0.00650568808236996	0.0390297244030709	0.398666931733721	0.0422073782458316	0.513453886323042	0.0519069718509266	0.616470009333724	0.0672659687022789
HC147AM	0	0	3.01591440848404	3.96217345599193	5.09524129897089	5.59582906810667	1.70659908534709	2.2978795390808	2.55128367372544	3.04067810174245	2.98579807155647	3.53558229862721	9.62464236324322	9.88716573396029	0.236066582122633	0.637069159281394	1.44677629808485	1.87101829203352	1.75069954219803	2.28908821652721	3.12518277888921	3.61519116560631	4.31872447210558	4.81516108978075	6.0415570542907	6.51535789082684	7.76422326821394	8.22534314428117	9.78906793822082	10.2441155896405	11.8308651420235	12.2927066841448	14.0339128659096	14.5171605951836	16.225940013807	16.7397046066256	18.4821134574725	19.0363488644957	3.46365907135345e-15	5.29082662533255e-15	0.00237375726078033	0.00900217542974726	0.0303341917925396	0.189600361288167	0.0335491941012666	0.266268078148907	0.0442312271967765	0.369463260779416	0.0625918157893286
HC148AM	0	0	2.36678377675798	2.60253786144392	6.95639254441569	7.78334747377488	1.72197687131727	2.34084207168175	3.56411746062096	3.92046366216404	5.00137952301136	5.36018888376489	16.1354445706469	15.9445803692021	0.268788785957423	0.686504349723515	1.56155825475075	1.92443898823943	2.01886017516332	2.38690222846719	3.5262577063577	3.72957612958305	4.87364961829211	5.00384244322174	6.71987203100282	6.79591047230075	8.58058168091945	8.62375888292239	10.733830253202	10.7445584995255	12.9233026888324	12.9045211222361	15.2705855653581	15.2190601321409	17.624242667409	17.5437509704643	20.0324944085783	19.9230399674876	5.16331808962007e-15	4.89835363414465e-15	0.00194678858923756	0.0068642897437078	0.0392630383870375	0.183451340198954	0.0444058841159094	0.289803124761471	0.0565833333902924	0.403204941824607	0.0774906488848732
HC149AM	0	0	2.67917181271812	3.17605209409233	6.17747194562413	6.33549748342809	1.87966736945176	2.8514950462118	2.44372566954762	2.90996339171754	2.9852345435787	3.49785088651676	11.4481074100692	11.1057299520654	0.23084469142239	0.673144906579621	1.29848837785237	1.76219887776084	1.57696949464215	2.11865136423324	2.73500475418867	3.1693969379984	3.69571358498476	4.08414860300294	5.08571134252884	5.42160334224384	6.45107136199429	6.74105362789622	8.08435846433071	8.34653858332882	9.74162401809393	9.98886797290774	11.5721975690605	11.8260745732452	13.4223438258417	13.6923326595057	15.3706525564119	15.6689060655376	5.16331808962007e-15	4.3199418498654e-15	0.00140408887140499	0.00530100835459812	0.0297929759893275	0.207828604682538	0.0323617791508637	0.300542545132134	0.0402749879315697	0.408580330898583	0.0557704556539125
HC150AM	0	0	2.44060405315619	3.34995264736137	4.60431447115907	5.49892885184701	1.57719867712943	2.81940555649027	2.48799137853769	3.59824812834052	3.12991543523882	4.49231204348406	12.2241888515367	11.1957950869618	0.233217380144115	0.749504745236804	1.23872939534486	1.82604658615668	1.61308512436342	2.28292100430354	2.75109118995852	3.33881222821921	3.75835574626904	4.36446799674004	5.14186473309445	5.76069505263936	6.5278101835397	7.17681328073572	8.13959575910129	8.79018996645188	9.77572184443768	10.4168387042719	11.5425194701171	12.1543639670492	13.3174284040046	13.8826925830428	15.1479704436316	15.6483359024608	3.99948899445401e-15	5.16331808962007e-15	0.00128663845041631	0.00584462694757715	0.0212303759880548	0.220972564620371	0.0261842683513764	0.318103284914619	0.0369884874228704	0.443263992819691	0.0551778433734345
HC160AM	0	0	2.10725787797028	3.31092922430455	5.30154631747263	5.84665873767181	1.41615440694287	2.65908517898934	3.06194542893919	3.84601191971698	3.44272207070521	4.3474104045646	10.0968783831349	10.5776731686088	0.242594457685461	0.717177418677095	1.41226639028316	1.85982374254811	1.80878492983431	2.31081374280522	3.17773757918583	3.5746562107095	4.3960249016271	4.77251904598254	6.07286871115467	6.43145871736456	7.73940766850169	8.10911258719785	9.66122959518609	10.0345823524234	11.5863065819446	11.9705964080663	13.6429064233303	14.0245736650747	15.6788676869121	16.0543546136444	17.7590056324883	18.1175642276132	4.3199418498654e-15	4.61821209513793e-15	0.00208095184620818	0.00710692779128264	0.0345748545040226	0.277578492155733	0.0390353642671347	0.367742343548387	0.0486839491166226	0.457559836058627	0.0650714758176891
HC166AM	0	0	2.52914775031951	3.35572620885546	5.45466800889453	6.66841548772907	1.52077793484026	2.76145739027144	2.78548498889748	3.77056015950114	3.33293463554199	4.3471054879383	11.1775767081692	11.8660392568951	0.251307777446506	1.00132782007033	1.40474875458117	2.17453265912208	1.86133156882122	2.69063822906053	3.22752056455344	3.90039976240153	4.49318170313592	5.09982581201949	6.19258087443865	6.74889480461516	7.89900385438735	8.43329258007691	9.82031130639759	10.3511339428984	11.7361544952459	12.2854296371294	13.7440793964855	14.3336355829113	15.7201047492766	16.3578390914969	17.7115352449375	18.4025098089633	4.76034406743969e-15	5.41533369831054e-15	0.0015693627308374	0.00466162337438737	0.0322566930004331	0.375827801061464	0.0397219412573784	0.521774135883621	0.0501370549915589	0.666168069785397	0.0695281212790654
HC169AM	0	0	3.92075462141843	4.9064897893617	7.41915558374466	7.43481190308118	2.05838412120582	3.09899104380311	4.67492619006755	6.16486019939291	5.75248732390171	5.85331794885899	14.2894610793986	14.4931928405123	0.369322512582148	0.66206083217542	2.07901348431014	2.41369131393384	2.90204113054145	3.31750712673986	5.07796519163981	5.50396388687175	7.1537936187846	7.62968396470101	9.78919971888074	10.3327884767362	12.3942359130421	13.0260797806399	15.2258043399348	15.9427178811427	17.9839428021115	18.7818088968603	20.7942288604631	21.6582909072808	23.4979116394245	24.4203771339099	26.1672598186423	27.1350126215716	5.65613157851879e-15	4.76034406743969e-15	0.00129160629386167	0.00605022525957071	0.0627673296546654	0.138886150946714	0.0670857288845292	0.217901072926206	0.0788613721200814	0.323559587314632	0.0959633042614289
HC170AM	0	0	2.5230507359445	3.92605121791696	4.5612799371028	5.85592155607132	1.44828783720577	2.57835859075037	2.59838456624433	3.34359907007784	3.23739511396911	4.09450030643281	11.1082988509898	11.4740125785409	0.241010283527109	0.707024232528766	1.25394262808215	1.80661174381416	1.73503904560398	2.40547178246429	2.97454712525171	3.67624354177824	4.13699916239613	4.91433122023264	5.64108354465903	6.48929565061871	7.14613182229992	8.0804856394736	8.82008612338971	9.8423030454061	10.4834485070264	11.5891748575686	12.2117008083912	13.3786361166253	13.9036923419949	15.1135322582776	15.5965239994199	16.824428338276	5.77276511892242e-15	5.03257995563588e-15	0.00162280718052771	0.00548683240646543	0.0294687978991881	0.180379382504399	0.0338678126295318	0.291302630796895	0.0432692326342011	0.420839603480631	0.0586208011816612
HC182AM	0	0	1.87768317200889	2.95723771738237	7.41411485276042	7.3077293696454	1.26560274576902	2.11657690022755	2.23805336632621	3.12983576341487	3.38332799412522	3.35118780003172	16.5266186732802	15.9653139792827	0.232494874734004	0.641494111295945	1.47034578494268	1.83249400169835	1.73168675348101	2.16613512813433	3.125669911581	3.45050062956895	4.31765035129771	4.61788945267711	6.07509489457857	6.34710001047424	7.85275096768463	8.11471066061911	9.97649551563271	10.2160616610126	12.1611448701387	12.3712431649757	14.5494237477897	14.7219542140732	16.9700708578519	17.0957539561827	19.4791171494836	19.5550182811045	3.82921918046341e-15	3.65101723459352e-15	0.00372870331063761	0.00725492851835574	0.0277178680973768	0.177404958624092	0.0304221746169277	0.264898101481099	0.0388738685193721	0.372328287793627	0.0541717144561007
HC186AM	0	0	2.89098466218068	4.08272900638138	7.16759927840958	7.92774827427393	2.00986695798514	3.38456900637131	3.68780682295878	8.73998290492776	4.95361031967262	5.75197134187923	20.0406098120497	20.2627798900866	0.274716043727353	0.759561685227977	1.51201162846251	2.18303009721322	2.15744701291987	3.06440781412793	3.73272635433671	4.7291660650498	5.23480565841523	6.36792044990648	7.12261024776279	8.40207585511324	9.00139955612823	10.4370995650332	11.0535055935418	12.6348055185119	13.0844909095268	14.7993951733179	15.1721165885086	17.0040168969529	17.2166451631116	19.1482494173842	19.2429125542846	21.2591192175469	4.47156463343072e-15	5.16331808962007e-15	0.0013682413978786	0.00693068861349146	0.0401079366179386	0.253568592828421	0.0438984034788755	0.345452251144758	0.0534218266400481	0.450773073327215	0.0691733210249296
HC187AM	0	0	2.05015927886575	2.6584222004521	6.0873036543121	6.32162197838757	1.52574452669832	2.14196946191197	2.6422003396056	2.83592381664478	3.29263029955514	3.46097773914094	8.03532488546236	8.54691142369346	0.206301888197584	0.719967932872854	1.17296914564853	1.61802089082495	1.40633159820687	1.91122985768522	2.44479743771456	2.82491465278673	3.2960998913387	3.63038563993083	4.54855788193357	4.84617392622379	5.77578081087369	6.05874257990944	7.2386004737317	7.52766955822304	8.70741045621845	9.01132785084253	10.3138917029497	10.6483575840253	11.9225632209119	12.2858641914667	13.6086127834224	14.0080730460521	4.3199418498654e-15	4.16280012749695e-15	0.00354447371210444	0.00468993793289682	0.0255138807385445	0.255345581498676	0.0288337753369469	0.371626337887127	0.0377832677446622	0.485775238190119	0.0540028524255702
HC193AM	0	0	2.79327520325101	3.79579648648918	6.42838229237375	7.76824967130827	1.6886425480845	2.93029606588484	3.24260693330708	3.71883005078416	4.95069881123834	5.29608395150635	10.8770241793027	9.78883031478671	0.243856983800498	0.686661150220163	1.52064688565079	1.94435202667621	1.8406513043239	2.36134301838248	3.26489807531097	3.5980407853966	4.46926315382518	4.68404316965252	6.21501556648944	6.22461579402966	7.94830165991753	7.75737067647523	10.0026552762397	9.59381229403558	12.0824116915796	11.4648284606041	14.3490214542485	13.5291957725268	16.6226458513705	15.614597825604	18.9855699525467	17.8006292578599	5.65613157851879e-15	3.65101723459352e-15	0.00160615484317009	0.00630607408518823	0.0301363858195119	0.157339934694924	0.0337996017121747	0.250208519714671	0.0428583775255446	0.370982284940958	0.0594535099713592
HC213AM	0	0	2.19047270305576	2.87102670189154	4.61731981912548	4.99606425394045	1.48977982506339	2.33188788322858	3.10102283139251	3.55994296144046	3.75222658828468	4.01818294289655	9.82158422943722	9.96055434148088	0.256832354316652	0.758510666548379	1.40381117165665	1.8774567655445	1.95697659059329	2.41776561953415	3.3794048986761	3.82351778902846	4.69881997202456	5.19291076581756	6.38206639617519	6.97861035745204	8.04642609993702	8.77177180128804	9.89233502412977	10.7606140678872	11.7162806053806	12.7317324093118	13.6132702231968	14.7753429153589	15.4638947430734	16.7700092855721	17.3194007810524	18.7600546914277	3.82921918046341e-15	4.61821209513793e-15	0.00195663094346512	0.00923236523102996	0.0471035218020506	0.352072993829878	0.0510742075444384	0.435830248536059	0.0588509952956931	0.520439023213442	0.0724735074097913
HC219AM	0	0	2.44268807193297	3.35746083882563	5.85962442191936	5.93341684934006	1.66737483009391	2.38482519321005	3.03373047684308	3.59897321266932	4.27583952191603	4.09024061824237	10.8255853671234	11.2438921448444	0.222599335404312	0.709027595613914	1.35962637263038	1.89804881474641	1.70800975427801	2.3924726371063	3.05169887028965	3.61345548372144	4.26092034508129	4.7576085419805	5.94253698404463	6.3649375234663	7.63335402524952	8.02044795180077	9.58268296395858	9.95576393736873	11.5402947200142	11.9219185913016	13.6214800607781	14.0157856257437	15.681297056361	16.0874728563963	17.7768913543355	18.1890381156781	5.41533369831054e-15	3.65101723459352e-15	0.00153584946414459	0.00801809150581328	0.0330481130388208	0.185244833854602	0.0368297149353448	0.293008119241781	0.0439862687080474	0.415028625399126	0.0582659311597293
HC223AM	0	0	3.05468792938297	3.59029822271632	4.98983126393287	5.24605860025462	1.38686053706218	2.46729622664098	2.62445262218773	2.80857445222051	2.89199046559246	3.36250884256838	9.80404861906787	9.71794296222181	0.213952766722919	0.649014665493043	1.311358778188	1.76000625961454	1.60042779179691	2.15317965601291	2.85693699891544	3.34595622117093	3.95087021950918	4.41252707086764	5.50978470296172	5.90952945799581	7.06169644350005	7.39794248285214	8.87974383219697	9.15648059194895	10.712915007743	10.9516100341099	12.6982662428888	12.9235114524005	14.6827851993338	14.9126322470983	16.7373920113192	16.9889329235081	4.16280012749695e-15	4.76034406743969e-15	0.00351957654577032	0.00816841934247454	0.0298271455882668	0.219996633471556	0.0334843208177598	0.300798956207748	0.0402988192080815	0.39625459470143	0.0514109045197524
HC233AM	0	0	2.74703303533693	2.99523485153095	6.85165790778669	8.04652335655662	1.674616314809	2.22642066035483	2.75363694684101	3.38833172094961	4.12473742053828	4.99324921147059	14.7535872981795	14.2884255982041	0.254840510106683	0.733048010085832	1.47979628830608	1.90578520476702	1.85235740962364	2.33404417439416	3.27012295434265	3.65856293746103	4.53253949905056	4.93657470781651	6.30574941280359	6.7238605387764	8.09220201983297	8.537697512718	10.1698160330457	10.6135106205805	12.2747432026797	12.7016669650538	14.5338826979331	14.9145593972942	16.792635634445	17.1125895124702	19.1057270368672	19.3507915385774	4.89835363414465e-15	5.41533369831054e-15	0.00127790536639653	0.0105141773404498	0.0380461374059077	0.218733948137184	0.0408185493056334	0.341083583071239	0.0487719552297261	0.460800453577623	0.0629544831283505
HC235ST	0	0	2.5070094198618	3.05893504481041	4.81063801743627	5.27431298291084	1.66218157196958	2.47239201021369	3.40420250618633	3.65080909684519	4.28406098659944	4.70011065193907	11.9921003096526	10.2915369972559	0.251367904890039	0.679487318073255	1.30439916636718	1.72942005830222	1.91279700471147	2.33961138050201	3.24905618307285	3.56878150449772	4.51413775738915	4.8103515978498	6.05937838583539	6.31115090625353	7.57926736284573	7.77453314232307	9.21581171693697	9.32132696557514	10.8136052229031	10.8120677559477	12.4461507145936	12.3137306511252	14.0233012553362	13.7531755407408	15.5896887765243	15.168388445245	3.99948899445401e-15	4.47156463343072e-15	0.00288821290779835	0.00689370548432537	0.0566072710797194	0.253101326953781	0.0605387178149908	0.335280474250641	0.0652148414790855	0.426136948178349	0.0764004261770743
HC236AM	0	0	4.02053121044116	4.04964872269617	5.15236156120911	4.55101788106051	1.65504036021498	1.80174965281299	3.20795097736097	3.01553438729215	3.84810298807694	3.44746285840798	11.2011130292592	11.5416467148052	0.262535136433907	0.508587253557788	1.51999792596021	1.70516010715567	1.99610014410227	2.25234089667834	3.47269193948443	3.7535849934818	4.77277113827115	5.11160501915795	6.50208630515341	6.93422929392439	8.20828801565509	8.76602380240904	10.1841232248822	10.8834471823423	12.1935598982311	13.0342614811679	14.3762098462246	15.3399280386827	16.5737522679407	17.6372081115106	18.8438766499945	19.9760856843868	4.16280012749695e-15	4.89835363414465e-15	0.00229079203225595	0.00201703592145774	0.0408864271049106	0.192736381184342	0.0434449843174708	0.276877626827143	0.0483524903397111	0.336159182617018	0.0616746216664189
HC237AM	0	0	2.07838951168594	1.89607563031077	4.74691378828396	4.2895005985605	1.57334316531257	1.02791881859531	2.7030570043516	2.39851398862987	3.11803740424674	2.60335349725295	9.97470905103016	11.1924736270892	0.232827788960084	0.377747902005427	1.30673978643245	1.37613267721397	1.67695408917505	1.73708248323474	2.90649786391847	3.02600249352497	3.9988652021235	4.22083240475101	5.52066928169481	5.86409160052905	7.04741077926	7.51596939139204	8.81997828220686	9.40011871525284	10.6038109117981	11.2868009797714	12.5113839810406	13.2795625837783	14.4010580140466	15.245130417612	16.3304064058205	17.2333806425021	3.65101723459352e-15	4.89835363414465e-15	0.00170106355885178	0.000843040037301625	0.0339661342084421	0.175533667276925	0.0377655045294696	0.219108349992545	0.0492812611754539	0.251569152469397	0.0712584241004551
HC238ST	0	0	3.62214946999248	4.49402678041058	5.34775667370427	5.87060403739586	1.91340057414234	2.45902509011187	2.73789356188017	3.22226600859265	3.11665002630907	3.47724772761729	15.1728632358687	14.7683340986932	0.303438583624251	0.492147418393276	1.75214457562411	1.94369566450488	2.27259040063717	2.5821733346185	4.00350820248759	4.33814925464122	5.58409896321952	5.92945123406728	7.73344593885232	8.0765371681357	9.89733178600454	10.2498375366595	12.3752839356011	12.7529167169715	14.870976303327	15.2876910095899	17.518386528307	17.984394326384	20.1404927721158	20.6612095828554	22.794875336921	23.3713816037585	5.16331808962007e-15	4.76034406743969e-15	0.00247236246680317	0.00342590041835488	0.041897900867297	0.149782881555269	0.0456610364161365	0.222583728531316	0.0553347814894936	0.277865763706269	0.0706144945802516
HC239AM	0	0	2.02756344419802	2.38472727736475	4.75575599128579	4.99410723485273	1.4983870460055	1.65604658193086	2.76732140479177	2.9809550779029	3.43954244956159	3.50380331430753	9.47507444782716	10.0883291564766	0.224825615983585	0.523128464934408	1.33557439618727	1.51753824694905	1.65877593623544	1.87066030192429	2.94187455091494	3.13075201619236	4.07573301998436	4.27966487195944	5.66426516567312	5.90505949492021	7.25189613254083	7.54924457664517	9.09343169532309	9.45484101943106	10.9490021103293	11.3766234001714	12.9399223530982	13.4284086016276	14.9252900804226	15.4676896375977	16.9644438226472	17.5519593416635	5.41533369831054e-15	5.29082662533255e-15	0.00143963955526582	0.00149807874679945	0.0299086731733011	0.247506677287898	0.0334528822472196	0.315958415416576	0.041116523299283	0.373646150947299	0.0546569440534615
HC240AM	0	0	3.51563904542853	3.39114354916575	5.92467887730961	6.73545685686439	2.10793764946703	2.74607840796731	2.89000817671106	3.0978003057697	4.74093013020834	5.03344082407889	11.4462989487873	11.6608492843255	0.286950632975783	0.655381413750253	1.77145512614569	2.09244897835802	2.21012450606643	2.57872257237899	3.95456071669859	4.22632313922015	5.50864713250117	5.74965380392263	7.67410058467365	7.87840580598072	9.84494105372163	10.0279296831806	12.3495971461245	12.5160432264045	14.8687095979637	15.0311047804321	17.5500393600553	17.7157152850288	20.2057166298645	20.3761787163461	22.9047884989391	23.0783017436937	4.47156463343072e-15	5.88708839775464e-15	0.00292879326008194	0.00621337538355435	0.0425514510153107	0.197520216844771	0.0449308417695954	0.271930654366014	0.0500694681032777	0.361849401035393	0.0620738281048134
HC241ST	0	0	2.61316417462477	3.34897791949238	5.75121450144844	5.13711036782509	1.93961823482035	2.85108470948072	2.7782617024543	3.161009128448	3.5392049066956	3.468838599479	7.4955918075773	8.90366594509717	0.215128044809125	0.696287751631204	1.36748368720653	1.7917274734545	1.64212014028055	2.1308909930405	2.94338305094783	3.29684959261148	4.05485798350159	4.3670946660201	5.66452283525354	5.92683353115398	7.25992775430574	7.50124351176029	9.14224648522656	9.36271723729895	11.0352858036322	11.2488600298462	13.0877456957591	13.2951044659028	15.1331434108526	15.3420304131032	17.2475681624579	17.4575477526083	5.53704178680165e-15	4.89835363414465e-15	0.00198009038193365	0.00593924876183618	0.0292156616268075	0.259418869314217	0.0334414723751355	0.335652133645367	0.0414285982085568	0.441871534066223	0.0560704600832264
HC242ST	0	0	4.44966785518572	5.07664738183961	5.77828096023196	6.9689161362124	1.59043782977166	2.40345185839982	3.53227365069264	4.09106087115472	3.78479656429563	4.46448723144064	11.9181413957515	12.3886771223096	0.284586609074469	0.602288107283714	1.66468154202116	2.00069172011348	2.14950532505733	2.54485123577562	3.7735105247801	4.14858858743645	5.22845085317274	5.62204829217896	7.20460519020183	7.62353408141775	9.17714895486655	9.63039342072917	11.4441501086179	11.9501702090028	13.7298202098994	14.2986358231316	16.1681365341214	16.8122541370751	18.5898866454909	19.3129474230231	21.0547914929462	21.8623847341679	4.16280012749695e-15	4.16280012749695e-15	0.0015690170744367	0.011324509984893	0.0342988618059647	0.125402813004107	0.0377991689753512	0.211760398480061	0.0475940176871248	0.317227042170923	0.0653585802800315
HC243ST	0	0	3.46532079865046	4.16935584119868	3.75695558770357	4.02833234932804	1.07609147601218	2.23033386691647	2.16812940567531	2.83684197930522	3.30073803748266	3.29497303286798	11.3236990403877	12.7823319866987	0.146083310808108	0.661233892556783	0.704765968272985	1.3869401105595	1.01564916224047	1.86880573261942	1.67718366126107	2.53986918726566	2.29616723191339	3.13534019965778	3.06783247032504	3.8400669129751	3.84503841015821	4.55646821229912	4.70351193661228	5.36668944668598	5.56926610449113	6.19210723060509	6.47195368147626	7.07513931704798	7.37595745373517	7.96634608187764	8.28915138183783	8.87504026883598	4.3199418498654e-15	4.3199418498654e-15	0.0020368709884527	0.00748571845142156	0.0261445711796101	0.231640652068376	0.029821042495717	0.338798914183987	0.0370821514471532	0.434011398730079	0.0495492317526295
HC245AM	0	0	2.41905769513466	3.56223798029393	5.05158971016896	5.81049736889316	1.44403054140237	2.9540900398371	3.00628401348707	3.58714560359277	3.36549813833903	4.03643050218481	11.4651261152552	12.7579747983436	0.247098085365605	0.756571549971794	1.33515327450272	1.99680296339768	1.82238410051932	2.64181716734948	3.15454610001486	3.88553639592819	4.38999187204673	5.07604037847793	5.99647077504084	6.62065575670864	7.58997797783198	8.19914343882907	9.36973790989297	9.98736302363635	11.1332305215258	11.7873109169823	12.9817611679999	13.681259517381	14.7960091159424	15.5430777525242	16.6298631721933	17.4161342140721	3.99948899445401e-15	3.82921918046341e-15	0.00158215711390035	0.00860655435350586	0.0422378224114219	0.181935556118345	0.0438594973884242	0.297069337651883	0.0522203900380395	0.421919443265071	0.064707336978321
HC246ST	0	0	2.30369950391935	3.03104181261299	4.74561070497041	6.40056208453765	1.85086133089175	2.83076094133327	3.28348810480335	4.10679147688645	3.50556474006949	4.90321903690565	8.40530535091036	9.39490996325544	0.232116891710332	0.804776313346856	1.19081762462592	1.94000612286399	1.57805883901398	2.53951533045318	2.64561652579138	3.69715194129696	3.5732223067302	4.76586058696686	4.80691480063279	6.13266358391427	6.02088171486692	7.49677443523528	7.41686418583507	9.03405763963658	8.82404168688755	10.568773444201	10.3436705195575	12.1973628633334	11.8676655808951	13.8145549544545	13.4493802381737	15.4708869192202	4.3199418498654e-15	4.47156463343072e-15	0.00272268994671314	0.00698061523028642	0.0294775036825313	0.284350045129208	0.0344435394032143	0.393590276635936	0.0454271715476062	0.504891502134673	0.0639554518494384
HC247ST	0	0	2.01729777552384	2.87752945206315	4.44961844201603	6.04531848965074	1.4620549274285	2.33690372885066	2.54764668091055	3.45055775155902	3.05511243842349	4.49931886067869	11.8351491656445	11.5462126082447	0.230890703898168	0.689482740259694	1.19685796548404	1.76502009590158	1.62261119605343	2.32034171080165	2.77132751516126	3.49744335143614	3.83528944983729	4.66083523067558	5.23642151937548	6.13292348794034	6.64290703955274	7.61188661073807	8.22310031343988	9.22370187981695	9.80890081043637	10.8201972718414	11.4764426717492	12.460844305997	13.1339620686467	14.0704800694794	14.8131543667104	15.6725635327077	4.3199418498654e-15	4.47156463343072e-15	0.00182177338580522	0.00391180016909997	0.033099385300501	0.152018977488792	0.0364048471810424	0.261375731145816	0.0468823763836335	0.390966733824004	0.0646554709389641
HC248ST	0	0	2.94359192469008	3.95613757454624	4.60804672567081	6.33967082511806	1.62852409625372	2.89941909830612	2.40450891466791	3.58933086594354	3.06219493212376	4.21439137161262	10.4878109806462	10.2586943405598	0.244528057604888	0.80710899346919	1.44020929591703	2.06374913014391	1.84082506817492	2.64642353826418	3.2300095303023	3.91430626684853	4.46541502443239	5.09138865860541	6.17112601466919	6.704044805125	7.88504792931946	8.34732377645727	9.87185765816597	10.2557575563666	11.8815441427133	12.2016474843397	14.0340000816808	14.293012577674	16.1765656790642	16.3846858392366	18.3644959384042	18.5334515400509	5.03257995563588e-15	4.76034406743969e-15	0.00304592922609965	0.0117056200949281	0.0388151852155775	0.367003501291535	0.0424692053065444	0.439630655811845	0.0518321998230309	0.530464913991518	0.0669339717348472
HC249ST	0	0	2.23901377090976	2.77388377919347	5.596660343795	5.73115450492429	1.52508890099745	2.31905495024655	1.84975343335357	2.62937035426972	3.48545492913868	3.91480287911901	8.2359101063721	8.61817598112168	0.210530024662901	0.592957782415518	1.18753970479656	1.6323403964777	1.45441497797875	1.97448736872594	2.53769527703699	3.0021938657428	3.43876100953466	3.89584708891521	4.73478187453149	5.20636415338939	6.00427308493336	6.52793762278036	7.52006624367633	8.12751635216391	9.05295465887728	9.76052139124016	10.7426477452273	11.5637013881375	12.4445603423683	13.3844066279817	14.2345592773462	15.289673350351	3.99948899445401e-15	4.47156463343072e-15	0.00247780329867793	0.00800744880447013	0.0287998052315187	0.16059236226929	0.0323280210322938	0.241533790511028	0.0404709513315319	0.336964739014176	0.0559549896121836
HC251ST	0	0	3.08601841642818	3.31219873381149	5.40754855823667	7.55515722558755	1.40652598656327	2.5293872844215	2.90766829792459	4.03742875358931	3.40886945970964	4.68183947194178	13.809683409264	12.8119315799095	0.290055539608353	0.774917986492053	1.55359412382678	1.98225344188137	2.03558922878192	2.47824673019082	3.52376307907515	3.79130068072093	4.89239993915065	5.04981777220565	6.76374188945901	6.79744541270987	8.66035436733891	8.56945681935343	10.8215084251812	10.6086676902236	12.9911147986499	12.6638917323977	15.2698107905974	14.8486819697574	17.5153380879284	17.0219697286027	19.7712069557428	19.233079463817	5.29082662533255e-15	4.16280012749695e-15	0.00145290824446497	0.00715365548929099	0.0340918430645449	0.224360404801038	0.038774320242306	0.353311532809519	0.0492370865482728	0.476831705665587	0.0681546337461527
HC253ST	0	0	2.49094146606174	2.69837741490295	5.11294786738094	4.96464593984287	1.86485356684726	2.63179895138377	3.22624571631051	3.63586731311952	4.62970596155796	4.37107145386694	7.10933105724232	7.43953225006282	0.237284067492532	0.681900958773423	1.33332828231867	1.79222277621524	1.68180247440448	2.21279381676196	2.94378121393697	3.41599969452541	4.05338101897664	4.55460948570453	5.59074889212949	6.1274727788302	7.10300348906763	7.68781240708932	8.84115755868183	9.47228170236601	10.5617435315058	11.2448535192346	12.3927036599529	13.1316210115344	14.1921690279642	14.9876986883558	16.0333273528881	16.8875439148113	3.99948899445401e-15	4.89835363414465e-15	0.00195987819818051	0.00934109571880624	0.0389649261089741	0.182519680680252	0.0427296666106975	0.291749570843111	0.0500130314416798	0.409080073941052	0.0630321006264927
HC254ST	0	0	1.92866322372912	2.42356738218907	5.33938550547652	5.63251421540718	1.28489174998376	1.75697043748112	3.44205328971543	3.75802460384385	3.96967448109285	4.40277677356206	11.1894791927808	11.3388388374837	0.241779928410392	0.608459062147182	1.34522054855293	1.6988806544716	1.80356167203438	2.17500827745194	3.13280266964571	3.43669866051844	4.35405931677307	4.66040021857301	5.96627985862785	6.30254400861568	7.57849846549247	7.95449509536127	9.39893198192059	9.80095389662332	11.2218999962557	11.64440739557	13.1403953188167	13.5741931069175	15.0334834797911	15.4746029594632	16.9461886340638	17.3900304357555	4.16280012749695e-15	4.61821209513793e-15	0.00131605929384262	0.00652009504246972	0.0297750265664729	0.148643049207811	0.0334823004930945	0.23972895611246	0.0428798421313286	0.354316022625973	0.0585561552979444
HC255ST	0	0	3.31581170182245	3.65383133012185	5.78761963566197	6.96677284832411	2.13670041022107	2.79287534262599	3.57146906714803	4.48972166496765	4.42361248917013	5.53347844043398	11.1320243071153	11.4538868557785	0.267744150519526	0.95185590495231	1.22933104812452	2.07707044901646	1.75321708463458	2.76777237799296	2.90619798875196	3.99078023085049	3.98776792418593	5.19444687252814	5.3198421601541	6.60698519240837	6.63766355268752	7.9704393491308	8.05934565990466	9.41933730433814	9.47352701512999	10.8545103253225	10.9340703368783	12.3566158408113	12.388105201332	13.8529809213558	13.8570615981233	15.3772201442098	5.03257995563588e-15	4.47156463343072e-15	0.00283788512291545	0.00923660136499287	0.0348280761493317	0.337549062593881	0.0386480514954121	0.489836445455059	0.0466159398409466	0.626636008912832	0.0612163353691001
HC256ST	0	0	2.09868346645469	2.80261479079053	4.52259634099612	5.146493348642	1.28835660332905	2.18541463704199	2.35632763361357	2.69960786849325	2.75105719673974	2.92861355457203	12.1197959968252	11.356475064038	0.230881039203709	0.660609466299314	1.29266457079762	1.68737074390767	1.58690146894649	2.00870454157753	2.74518895708962	3.06281812785238	3.72166118859411	4.01915315397322	5.15885210198679	5.3965942599248	6.59922416505881	6.78067649274003	8.3261228578056	8.42691874261903	10.0818979860842	10.1091770372685	12.0036206671471	11.9648855633862	13.9346060337639	13.8361485077516	15.9418622051596	15.7919858325095	4.47156463343072e-15	4.3199418498654e-15	0.00189143733332305	0.0101739966947192	0.0277774271864116	0.180504022039269	0.0323178145107966	0.279095133027535	0.0431640059685248	0.390089940183304	0.0621637846035536
HC257ST	0	0	2.26422577939788	3.24731728292039	5.00435313281578	6.72104668294766	1.51322104619727	2.6220579691667	3.59709028931513	3.50452634548628	3.63881291430795	3.70617122131163	11.7965757343699	12.0010102124024	0.240407907591984	0.764726315945778	1.41642239116601	2.03969133327672	1.80174704838857	2.58236126825302	3.18783832336728	3.82974798913345	4.43852047056993	5.04184196051922	6.16386179149577	6.74471176762314	7.9043547907458	8.4908626110665	9.91139900696577	10.5072624416457	11.9410510525658	12.5433388786858	14.1025734472509	14.7027091275971	16.250560820133	16.8404772868067	18.4341349027081	19.0080434603826	5.29082662533255e-15	4.47156463343072e-15	0.00122055110807906	0.00765550220471837	0.0322943240267728	0.188428612413403	0.0364983738718885	0.306816591054406	0.045294022878122	0.437336995466557	0.0575399965483753
HC258ST	0	0	2.58170865601352	2.65848762139741	5.09207099405687	5.8840508189563	1.87794848917592	2.34762759548155	3.64543923719708	4.09836550228963	3.9603231454322	4.42567799440759	10.5217802517787	10.0768415109146	0.2317424097971	0.694065288574216	1.28930737076653	1.73664716506965	1.67535810425178	2.21334433566637	2.90780003042162	3.31246677202458	4.01743818425821	4.33896233540832	5.51835895730549	5.70776681237421	7.02057028875744	7.08963186356456	8.73351294969128	8.673696010709	10.4563006218238	10.2743643367541	12.2791668779315	11.9828543056508	14.088327976993	13.6868545160419	15.9243169247674	15.4271211474091	4.47156463343072e-15	4.89835363414465e-15	0.00182074458333814	0.00983065307822069	0.0340156510249106	0.189945972119495	0.0365260881188869	0.303942390257925	0.0460080076235404	0.421703686847514	0.0634701178127283
HC259ST	0	0	2.20286954078365	2.62490041138302	5.47364270398927	5.58746212340898	1.42864511474069	2.45414061124217	3.3512703300182	3.97400244943687	3.71665172286877	4.18156466636381	11.6056045512969	12.260535541456	0.23084039241141	0.782370033145113	1.30755233604195	1.9647119667321	1.71803589755161	2.46867191324491	3.0140188467632	3.6031006302215	4.18616280240397	4.72448604591527	5.75556113241644	6.23495096065246	7.31970073509597	7.76364188635292	9.10138098188627	9.51282331799195	10.8865625589331	11.2782155420067	12.7835927560625	13.1546957502699	14.6638180370868	15.0187096771189	16.5825845947662	16.9185179743948	3.65101723459352e-15	4.16280012749695e-15	0.000956579504806177	0.00854673477142735	0.0416324401557365	0.217620892703346	0.043237557132368	0.336548225363448	0.0483863543389213	0.464790149331725	0.0544834181884569
HC260ST	0	0	2.30763775271747	2.58063098054301	4.12102472205427	4.20738729379031	1.5021325960454	2.12154963348401	2.44378117363906	2.74862569187298	3.10523502379864	3.00831091960723	6.64368710030019	6.97563544465415	0.182394347248297	0.611963725094518	0.74834217022369	1.38270008728528	1.10375023345554	1.75524783444261	1.70813557635258	2.24115131608633	2.26494309852153	2.7048923005782	2.93673096048552	3.27698307478587	3.59585834029927	3.87039175772675	4.31064956379674	4.52942089063101	5.02078957646571	5.20296731193633	5.76272301085503	5.9098910722094	6.50410614946369	6.63051477125543	7.25934966990304	7.36568882474787	3.82921918046341e-15	4.3199418498654e-15	0.00248990422779103	0.0102367063783471	0.024083525229785	0.156615535611796	0.0291166352120019	0.235312815186424	0.0398896277485522	0.340350994957365	0.0571817277887243
HC261ST	0	0	2.43630191133707	2.56648847617243	4.44894017817058	5.14514263854754	1.60020792339386	2.2478857088095	2.7467076872972	3.28106759584443	3.48007680949896	4.16788372395301	11.6813210864298	11.2448760197807	0.274389187935964	0.773808754816916	1.39143321485331	2.04229671571998	2.0530894991941	2.80494810099323	3.46508634736094	4.26061381902995	4.82020979190006	5.71092836409368	6.47160430276003	7.4496261499488	8.10388775273509	9.17083801947247	9.84252897190521	10.9873625503869	11.5382840364953	12.7400007919095	13.2452314670973	14.4865736505738	14.8909568497851	16.1577329836141	16.4994472767539	17.7827765567696	3.99948899445401e-15	5.77276511892242e-15	0.0026090878353411	0.00930165519827235	0.0366075667908134	0.230166336287222	0.0447576687538637	0.319817923536538	0.0570889873835199	0.442050292653848	0.0757029514557856
HC262ST	0	0	2.21189477765269	2.7911541605046	4.84265930686819	5.78430809388526	1.36710816434208	2.34547428726728	2.1572145816178	2.45437613436199	2.71960175815536	3.32565371776575	8.24921660818079	7.14372505247024	0.19846170823182	0.644808055657267	1.27471113682452	1.61466179647141	1.44492383041626	1.76805094237979	2.59399566954104	2.77347056242698	3.50056691084075	3.61996079420617	4.88877521234492	4.94977503684973	6.23536854927073	6.26025952011278	7.88571961915946	7.86436651944355	9.56203319838296	9.48672655519532	11.4405351318965	11.2942219637305	13.3465883093413	13.1178362412531	15.3681883210581	15.050518122404	4.47156463343072e-15	3.99948899445401e-15	0.00191648624183735	0.00676106868820253	0.0258404368689871	0.147818226474294	0.0297050606239359	0.274807718312059	0.0379661533910138	0.399393312850493	0.0526968745032557
HC263ST	0	0	2.0653272301972	2.37236905209103	3.72282771521617	4.34610872571365	1.44731506413753	2.06111143433455	1.78915716957852	2.70601960455578	2.64064691710117	3.3463451900697	6.80874366568865	5.99997585682369	0.193440845123784	0.564661802833533	1.06203859145324	1.45318204940496	1.32928401188693	1.75867355919581	2.26881272958269	2.60897938559561	3.04917853369467	3.39212671417652	4.16967665972851	4.50898939451677	5.28246192125329	5.62938714869046	6.61434187356408	6.95406962490234	7.96873496991159	8.29457579038647	9.45449485016987	9.7433794555798	10.9465720149948	11.1787281317224	12.5030008177522	12.6573580055089	4.61821209513793e-15	4.16280012749695e-15	0.00153242700250856	0.00709635417916419	0.0267649423587394	0.141991529152699	0.0299323108059668	0.2254323310249	0.0376721194320044	0.324599772072688	0.052985744684683
HC264AM	0	0	2.45757968366628	2.76920002847729	6.19189419880006	5.52962059134528	1.60774842078618	1.65629428035191	3.51650301967742	3.28057933661376	5.15329734601278	4.59072998239499	9.14698327363586	11.6225205119658	0.262519362530492	0.496273575856465	1.36727415675392	1.54616718045393	1.90817350257994	2.02582392814474	3.25666107346882	3.35741831098108	4.51971407424465	4.66998144059751	6.12633576545938	6.3874567644479	7.71190793500509	8.10872388318932	9.44999522790284	10.0013196915355	11.155871722971	11.8705088798263	12.9166164363216	13.7928399961293	14.6297777429459	15.670708650971	16.3452614169144	17.5376796066445	5.65613157851879e-15	3.65101723459352e-15	0.00164807386852943	0.0084738274045771	0.0365381479317342	0.220420431331195	0.0404020061636219	0.277527956856016	0.0509030785109562	0.323366260774603	0.0678149275168063
HC265ST	0	0	2.54687878108109	3.12157589750066	5.37128001384516	6.14950864912611	1.62966451837085	2.74515311583455	2.46508818875248	3.4938366719383	3.46541892276406	4.16957574673962	11.7614916451005	11.9594606486025	0.240132339417471	0.83192273120432	1.20683056013575	1.92072451644585	1.62368028602186	2.48148630264428	2.71602472415464	3.44508518459738	3.71258367526818	4.35547317678372	5.06066002249786	5.56918592320226	6.43180945542292	6.82009065472007	8.00401077661692	8.27460888353668	9.59381255669872	9.75763192780747	11.2794728731542	11.3565953657783	12.9547563772451	12.9552858685042	14.654592844402	14.5926766819007	5.29082662533255e-15	4.3199418498654e-15	0.00274671459005044	0.0070395897738594	0.030136562702765	0.27897647263689	0.0364835224266843	0.376313759637195	0.0499831088288377	0.504502289503053	0.073036999064772
HC266ST	0	0	2.03314747051677	2.55322521000104	3.85106437050404	4.77846665660398	1.24941222798267	2.1886996367998	2.13532863423044	2.72825646424017	2.49773894016121	3.50413150270474	9.93073177595636	10.5094443260082	0.221731206421149	0.692604108412426	1.26521158423208	1.73137484037294	1.54248738522639	2.13752254776156	2.710063601947	3.17878532051071	3.70892453999835	4.12437039576097	5.14992435696493	5.486844981634	6.58848334773913	6.87378486269631	8.29521046028132	8.5279751011618	10.0261598431054	10.2178241498035	11.916805267823	12.0624569030848	13.811937773743	13.9092855984464	15.7831501325713	15.8267376184119	4.16280012749695e-15	4.47156463343072e-15	0.00180531740304443	0.00850634128300904	0.0268087073825585	0.214115813440774	0.0299147387423709	0.326335528387106	0.0382244868431464	0.43966655044684	0.0536414788218621
HC267ST	0	0	2.53776530866171	3.15927716725802	5.339714047148	5.70787416293185	1.77037803368432	2.55131279867144	3.57597474160644	3.8239098027198	3.99409967846535	4.37658893406579	12.0408695660225	12.382377818852	0.247310344616016	0.748431083075501	1.3139579861274	1.93718835421872	1.77601499803021	2.55160626383135	3.05081468477754	3.83721720934924	4.22454750391081	5.08754467641792	5.77090588504976	6.71702738874688	7.32416293734569	8.36948929613154	9.07455690198998	10.2134085416178	10.831082056026	12.0534771846061	12.6739408087166	13.9682551978964	14.4985416244842	15.8511225577931	16.3378790480451	17.7332870936183	5.77276511892242e-15	4.61821209513793e-15	0.00218767003394172	0.00802190559723159	0.0350756058146448	0.200002041049295	0.038421032050674	0.313577893796238	0.0457677668165849	0.439088847331789	0.0598572411277381
HC268ST	0	0	3.97333905782944	3.37153151592381	4.97163438733878	6.22568265621872	2.11412339321145	3.0912674737203	3.21238306868734	4.31436704758264	4.18854162807993	4.98408516271191	18.0153929816619	17.0788691035063	0.37577340814493	0.919383834916815	2.07398596878455	2.85776602050631	2.93485449751982	4.08847235238593	5.09670532252088	6.16590438040199	7.18352563497862	8.23210045701053	9.82302459526761	10.7473193024519	12.4679569874676	13.2452277033177	15.3375208729324	15.8990631590319	18.154245466208	18.4683670800294	21.0101970130691	21.0313131521918	23.7648216576396	23.4750761875777	26.4607517178225	25.8421879173104	4.61821209513793e-15	5.03257995563588e-15	0.00152834728382455	0.00885888965203296	0.0645935083972061	0.191056347901908	0.0707094012166098	0.311766670303506	0.0813711995691626	0.443511694652424	0.0990540354452597
HC269ST	0	0	3.278473332377	3.60637758687826	5.83798591173476	7.31906606897284	1.90441006677397	3.05997919533142	2.81058438191675	4.06608536835053	3.59375298141762	4.58263281660054	11.6377865313636	12.4836633284112	0.260392971524081	0.798772540060919	1.58837396457163	2.18186222927412	1.959140948146	2.78282516162225	3.4872556020685	4.19622495759174	4.82784268079339	5.49291299710412	6.72511227177727	7.28663069526953	8.61913182985249	9.12783807284795	10.8263809418572	11.288558493975	13.052585511704	13.4977035024077	15.4469470349807	15.8694115547041	17.8381386250252	18.2339970795262	20.2937819180259	20.6411238084734	5.53704178680165e-15	4.89835363414465e-15	0.00181236484443083	0.00583377586742745	0.0398065678487091	0.21954161242766	0.0435845163055688	0.335216804036779	0.0503441127129113	0.46569750820627	0.0629414707268636
HC270ST	0	0	1.61932313587214	2.3372898060741	4.31122928692805	4.6563797684553	1.21125614851248	2.0570714977367	1.9288563394545	2.70581562329786	2.34751243099001	3.26024628348715	10.3266861009644	9.71491512195443	0.198007632963962	0.593881469273293	0.957186132245096	1.44324820460138	1.29747987953818	1.85510086565712	2.15051489153453	2.67155092241032	2.91471043331944	3.45927696921282	3.93801545479424	4.50991393415677	4.9725821420144	5.58370809853178	6.16717364931485	6.81439441418765	7.38013635557861	8.0603916722389	8.68083387238141	9.38200845427814	9.98588758299691	10.6940104469857	11.3244717061717	12.0229643992772	3.82921918046341e-15	3.82921918046341e-15	0.0024717840888811	0.00833316551941119	0.0213218019556924	0.157483713388762	0.0269192609568272	0.246981582613191	0.0364542571241076	0.348393716566765	0.0509492115316699
HC271ST	0	0	1.62238986714686	2.11883454492378	4.43252276619996	4.84927019310469	1.16537163906927	2.00883692639379	1.86561439118208	2.41520287047663	3.06531296236854	3.39030147031044	6.5105436740441	5.945828289578	0.175652613880057	0.498412810651734	0.904072414568776	1.27887497730731	1.10041574748686	1.56083897445211	1.85224551334222	2.21897965737061	2.46782024172244	2.7733403496655	3.38749947404477	3.60840100815976	4.29209373516666	4.44982464074942	5.38145718266296	5.47631317223029	6.47779470957621	6.52181796322391	7.68698072137497	7.68379186494338	8.9028265003242	8.86166830365942	10.1844528418225	10.1071346427022	3.99948899445401e-15	3.26556908942977e-15	0.00130315601590896	0.00496716425979678	0.0190906609158047	0.131692734371531	0.0237190057120336	0.197649543980076	0.0340540393405129	0.283999901616063	0.05166665540223
HC272ST	0	0	2.48700634752158	4.11032329824742	5.19690949380563	5.81608298239817	1.77701005266837	3.29154404607193	2.60370807756065	3.64441547001215	3.54617346573338	4.55277921023226	9.69292439288705	9.80737280177567	0.248724423764582	0.835785377344015	1.37929483394632	2.14678464629418	1.77329812365075	2.71848921835568	3.07326564383199	3.80065289806948	4.23426783514006	4.84833768533453	5.83620688037859	6.29961410869246	7.43783334092611	7.79311704385236	9.28269462348037	9.51377938328332	11.1308750849544	11.244792049337	13.10155296186	13.081811486378	15.05322278484	14.9018033125503	17.0496683465684	16.7547762245078	4.47156463343072e-15	4.61821209513793e-15	0.0029543730993416	0.00800128160163559	0.0329667319827382	0.1378361501507	0.038047091307472	0.281241410643357	0.0468509147257522	0.444541704425517	0.0654362504842046
HC273ST	0	0	3.49866096817348	4.38224784136988	6.56465490462114	7.1275637131839	1.94742674780831	3.19412293297713	3.81282180596786	15.4530115199648	5.00630966071926	5.89567321498594	7.9451941464498	8.06536068546733	0.301806294262912	1.12159116302616	1.62035991843987	2.49797300726972	2.27939372052171	3.38943669642005	3.95282941010272	5.06200633489333	5.5451860051541	6.73583160430848	7.55418803742999	8.77427071314679	9.53703912232632	10.783535447882	11.6826712284952	12.9072472667488	13.7645198621662	14.9422361686839	15.8715556674046	16.9675536369127	17.8861149669855	18.8863954226886	19.8591753008137	20.7458471493126	5.16331808962007e-15	6.21745831165493e-15	0.00199276197541629	0.00488726616091841	0.0608024270177348	0.325654271559432	0.0628746269954526	0.54746830531553	0.0670797313781204	0.745038890890108	0.0778886447449498
HC274ST	0	0	2.38286446784579	2.98826820809206	5.20118408845592	5.54979053222734	1.8173106499199	2.69391854667986	3.09778422774277	3.75980580629312	3.94089020722033	4.07245240482227	7.85834819016764	8.1351558674599	0.219135834344809	0.768004032850317	1.18064611986067	1.74441247905211	1.48143676167314	2.20477636261629	2.54803907060987	3.17769782839514	3.46486878309678	4.01269218677551	4.75711890797377	5.16420121642114	6.02147070931972	6.31372559637423	7.49183922695738	7.68156964534069	8.9526699725111	9.06767432150793	10.5227168366433	10.5826755484759	12.0773891786613	12.1005763914636	13.6839762360775	13.6797237375023	5.99923349168101e-15	5.41533369831054e-15	0.00250070568732877	0.00731268109089032	0.0251712336923276	0.25841673439089	0.0302096183188869	0.392407140086289	0.0405280926284944	0.507459978503897	0.0585287858001891
HC275ST	0	0	3.40487829561007	3.6053072895118	4.52914584641266	5.12075983772928	1.77947961751461	2.60177984792342	2.59430992095488	3.18159385474901	2.82002546314307	3.4797321219077	17.4339965943948	17.5805307506287	0.28170369006333	0.739299444414473	1.59139797639	2.09043164769234	2.09565611697974	2.67232607617843	3.66815764859014	4.13943195214603	5.12645603375173	5.56724678484254	7.09705657072488	7.51730700256941	9.09972665313753	9.52046022413585	11.381162122149	11.8135616480559	13.6849407327505	14.1437043496256	16.1126186251904	16.6014120677909	18.5161796062908	19.0375153443225	20.9315207553296	21.4891453566728	4.61821209513793e-15	5.41533369831054e-15	0.00287762320208694	0.00901307915653158	0.0364717783971073	0.259108816863719	0.0416727242106326	0.33765373859902	0.0535938389043431	0.446080668481392	0.0716413787739146
HC276ST	0	0	2.40090116701588	3.52368514121569	4.82489191522117	6.35633849973139	1.54556558645211	2.80795264677141	3.52312594319409	4.40439440199432	3.94752110192913	5.5442171388234	10.9979915284143	10.5582366540904	0.214508788006246	0.61779331987568	1.16127963487807	1.66530499053905	1.59014802902737	2.29017557527258	2.75228778632282	3.54460539274338	3.84130374403221	4.75812634116066	5.25254756353899	6.2538393972862	6.65788348355143	7.72532847522493	8.21319078684344	9.3168287097553	9.75457316169888	10.8671613845916	11.353834295044	12.4517483634476	12.9243978061814	13.9906242663209	14.4984886485462	15.5197545771113	5.16331808962007e-15	3.65101723459352e-15	0.00278403482316328	0.00445443935327958	0.0341485018215206	0.166324292448328	0.0358918240539631	0.268384455939262	0.0411301995539082	0.369640675085786	0.0544154385657924
HC277ST	0	0	1.65897285128151	2.64398668385439	6.05317985356549	5.43418506094295	1.35469427007343	2.1897316474315	2.13452602860925	2.804260137687	2.83064861500401	2.93383220561378	12.6736656712411	14.7097795014447	0.21631280137892	0.609728300516194	1.02082612984595	1.53384302424075	1.32878474679942	1.94866489958978	2.18727782532426	2.79442690187915	2.91936364951607	3.55420505762802	3.94952579658718	4.58784502305564	4.98425060148992	5.65121916875835	6.2169872731529	6.93439422857482	7.48794807063715	8.28000456203297	8.88753223211025	9.77048515150027	10.3186492919797	11.2986020602831	11.8140395883267	12.8910220393424	4.47156463343072e-15	5.16331808962007e-15	0.00290685777129387	0.00786595307145969	0.0215838392498416	0.178999306269931	0.0257776089363398	0.26059603845973	0.0344476838021913	0.356141429377702	0.0516764363400634
HC278ST	0	0	4.59877935668647	6.56096235349705	5.7384201080276	6.29569438227576	1.77812513737047	2.73378719862197	3.11515987136215	3.58911362928158	3.53464939034683	3.7994413693954	15.6657012936076	16.7448429436869	0.226282117663326	0.961811486608669	0.979059738008791	1.76355771021226	1.48108372777236	2.37967277445502	2.39009561687233	3.17350281012758	3.24247064678693	3.90396479709532	4.24467788292899	4.72206134422922	5.22761084702776	5.53232339141951	6.2815068107679	6.40436198304338	7.32175642044674	7.29692005398691	8.398626867838	8.24089102300521	9.45965645896689	9.20815678864605	10.5359330585427	10.2015160109311	3.82921918046341e-15	4.76034406743969e-15	0.0029904439322464	0.00696858853888827	0.0284597241583555	0.337026442835542	0.0344354839290026	0.516993758013472	0.0453620256133601	0.680985387772822	0.0628549293156287
HC279ST	0	0	2.04000236709755	2.68668841569907	7.34228510729101	5.7286761071423	1.47893592435393	2.45479824944447	2.53528272601551	3.17490199475437	4.11384957734187	3.95718178811945	12.8992301533782	12.1372658383712	0.206632770550392	0.720751047758474	1.13305235941691	1.79853452543459	1.41909296068639	2.21195061567876	2.43731000461505	3.0942354249717	3.30725698132562	3.91710266128431	4.54111036285629	5.07740225549969	5.78036716202205	6.25485039345476	7.25124368825094	7.66426417308853	8.76311857152307	9.12460785876138	10.4184993410328	10.7263365584288	12.1050500449355	12.3627502271752	13.8579144037002	14.0649740888296	4.47156463343072e-15	4.89835363414465e-15	0.00284173991980168	0.00876389340978913	0.0259987583327365	0.121353353163312	0.0306451996444226	0.242258032875601	0.0422574824052499	0.387692235420547	0.0616292411658805
HC280ST	0	0	1.73695936873661	2.84720821048505	4.32928229581717	5.40005561059817	1.20697319744559	2.3075796321547	2.73892682407418	3.87246193047336	2.95630836973742	4.14697540028581	12.9089455238585	11.6536566928082	0.22632315011121	0.644585523069702	1.30338757105574	1.81658474247894	1.64025353393159	2.32484144178131	2.88168153332841	3.48420968540262	3.96414038247477	4.54319930688559	5.4907612593324	6.00473222706259	7.01875568777083	7.48388490314001	8.81492418429541	9.20063684325753	10.6357641050645	10.9294310434323	12.6041323153518	12.7811340160999	14.5738530422094	14.6257722982026	16.6037495259623	16.5249471328845	4.3199418498654e-15	5.03257995563588e-15	0.00119719088065906	0.00986383166129902	0.0292855899927245	0.0978533041957289	0.0336587811462749	0.198655673172022	0.0421103856530056	0.325659497020574	0.0540842693690664
HC281ST	0	0	2.98087718803121	3.81225570671538	5.12231156614823	5.99821081893851	1.60990570734698	2.64024604499772	3.53267207330274	3.98128035926985	4.02028759698633	5.20066758989463	19.544866732952	19.8179885937363	0.265815619950617	0.760908514346764	1.37192906556168	2.102503999368	1.97784184704234	2.95155972345763	3.38055419512293	4.49390489622284	4.71013358526226	6.00450103873336	6.35244590601369	7.77271956533785	7.96990966593962	9.47302954104304	9.72940922146525	11.253547789866	11.4712358884294	12.9800945365369	13.2788260563562	14.7472638131918	15.0609968860323	16.4831303145871	16.8534975715568	18.2244622669144	3.99948899445401e-15	4.47156463343072e-15	0.00379673289858829	0.0118863117029241	0.0389188943726772	0.171770574627764	0.0439908048285874	0.282261705441211	0.0522893023719293	0.4162613695025	0.0683664835686246
HC282ST	0	0	1.99684299902345	2.29613417554278	5.02458257748692	6.34648165638216	1.27772808220024	1.8845475804844	3.28100448757411	4.97411744825045	3.52475212185461	4.18182809451722	9.40483534684505	9.89630209587147	0.238710327037758	0.664668442006669	1.27295806450797	1.71233031667948	1.65546940081911	2.16100504864691	2.8397466082197	3.29048776679936	3.90006523917569	4.36484375412944	5.35509911297331	5.80854715591508	6.80961181559754	7.26057011678264	8.47617171584047	8.91020694690548	10.1418359091602	10.5574992209593	11.907821047013	12.3016299233624	13.6539953950758	14.0321085236787	15.4327786239706	15.8021526235836	4.61821209513793e-15	4.47156463343072e-15	0.0011786839960822	0.00610260080839229	0.0238981243868503	0.180096598439109	0.0304958966010288	0.287220510259109	0.0421644780550212	0.392051964215389	0.0605349655201092
HC283ST	0	0	3.03047284907863	3.65770007031531	5.64151144302241	5.92421281231132	2.25035271989282	3.06387345272813	3.91906118744459	4.20391437487597	4.5079544862644	5.06807893416905	12.5519721732581	12.5787850371451	0.26223298243683	0.901158616503475	1.40369000657252	2.09238294021912	1.9298487205515	2.66003974559974	3.32706236733942	3.8918527273327	4.61481498790756	5.07291596921504	6.26443419243532	6.65646231340773	7.88319039233692	8.25894761187537	9.68320912782879	10.0870245882141	11.4672508155137	11.9245093029319	13.3405827583662	13.8687543387115	15.1951971007874	15.8000652636421	17.0809912033874	17.7632640229472	5.29082662533255e-15	4.47156463343072e-15	0.00135113575464528	0.00694113247342613	0.0446784503086979	0.313137485709694	0.0485913895054807	0.443927386293067	0.0594847795376759	0.588314632092851	0.0769751154217327
HC284ST	0	0	2.64570037682907	3.72515363106193	5.08683444780719	6.09581429662356	1.61479578247022	2.82216863816565	2.43307734024232	3.42398122077189	2.75764383121751	3.80376327084585	13.7801399921643	14.4862945991089	0.243122395929209	0.772832424333393	1.25246808570445	1.90356374670898	1.59310171088085	2.35868703786587	2.69448982416824	3.43013204438626	3.64573814963339	4.40616122930173	4.99752121982949	5.78707828694877	6.37345892824554	7.21628021474146	7.99818994418811	8.92693162315522	9.66434759614528	10.7004491786516	11.4661545011182	12.6270973551931	13.2845323070071	14.5714410625651	15.1602195537724	16.5716688616147	3.65101723459352e-15	4.47156463343072e-15	0.00126722459049856	0.0067549754085939	0.027523891752732	0.232132523319894	0.030994151371905	0.332923719056198	0.0416339859858732	0.459364684936573	0.0597049193624499
HC286ST	0	0	2.00964565635279	2.74062677196162	4.77361185421924	5.45098608461153	1.45776813693291	2.31258647045837	2.38574372093265	3.03344083462288	3.26247470804649	3.73517375557131	11.699282346533	11.6495648083577	0.223304032824734	0.873901985438071	1.2259145312878	1.78818641117027	1.53729452624125	2.10108011741876	2.66289650079177	3.03688176038882	3.63201484888339	3.92413174531094	5.00176979943554	5.20704165885379	6.37805763648435	6.51403908245476	8.00826340407544	8.07272822881303	9.68027396091666	9.67362218646696	11.5045533536087	11.4285435074604	13.3530539381906	13.2036730283322	15.2698479566008	15.0509262988299	5.65613157851879e-15	3.05466017637139e-15	0.00213024534248343	0.00677540135317581	0.0313334445651712	0.421187727540519	0.0352309774201031	0.526016773837816	0.042564375625234	0.62446879701018	0.0568108759771878
HC287ST	0	0	2.03774089930606	3.07654330367284	4.37087864169586	5.1282213244967	1.47468683311233	2.55835623652086	2.94635971524433	3.58487119019852	3.26834351797614	4.02322917714109	8.84179958802926	8.71640141847844	0.216874771954906	0.865599277329277	1.10096610919609	1.82861390137949	1.59437421969169	2.4350127538821	2.67764068746414	3.49385907572656	3.68992953406006	4.55444161787491	4.93777479553843	5.85439997089351	6.15954812680181	7.14058081977895	7.49125234066038	8.52812245641999	8.80386910728816	9.89002854153594	10.1686758906032	11.2888400188083	11.5106509934612	12.6542336021737	12.8621524447716	14.0186270740571	5.65613157851879e-15	3.82921918046341e-15	0.00217269194122045	0.0100121600671674	0.0344645783959134	0.35513168019671	0.0374765144426588	0.505192881287654	0.0459286616887626	0.618569840430566	0.0627334734018994
HC288ST	0	0	2.65414888190608	3.20640899637469	5.13774480092252	5.25935900737304	1.72686121373932	2.60965868403286	2.92928671904299	3.97271847388954	3.49091993847039	4.16820686416902	9.83199449118985	9.44885493861578	0.211652797191813	0.748307751204503	1.07099018577751	1.68800413096979	1.45467868770011	2.19066127335157	2.47006974168418	3.22713040663398	3.40779146784439	4.21582417162766	4.63503181209285	5.45070109251111	5.86670652900389	6.69169113254941	7.24543979497208	8.0841632711639	8.6268121465531	9.48179207759392	10.073429182364	10.9464627311893	11.5060087097406	12.3819453122409	12.9516253096863	13.8198613422517	3.82921918046341e-15	4.89835363414465e-15	0.0025435823449622	0.00689666622222377	0.0268246623547198	0.312273599758134	0.0328862583537936	0.398477911590015	0.0428068456058438	0.499534332623523	0.056929563086182
HC291ST	0	0	2.93013761197172	3.44949330230033	5.49547232633744	6.40264154309425	1.92570146004035	2.62932741962761	3.43478574666396	4.26230309852733	3.9646933636459	4.67780748787643	14.1426744306829	14.1321625087164	0.303084886584274	0.709719382957422	1.59216953371292	2.00181914218064	2.29696603338176	2.78403527124855	3.93810733637948	4.43534852479651	5.52333479903336	6.08064351003029	7.48856438791078	8.08542484210218	9.4362508536103	10.0591302765032	11.5227142218419	12.1346016382431	13.5582498141918	14.1377156816472	15.6166016820515	16.1423178081541	17.6062020688654	18.068384163478	19.5602594002546	19.9522914384064	4.47156463343072e-15	4.89835363414465e-15	0.00196663881893165	0.00704627445552043	0.0400796262343286	0.21634460771764	0.0439965698384999	0.314234168142714	0.0537441630936308	0.42566715589106	0.0724442067946691
HC294ST	0	0	3.52082384672086	3.66576004461717	5.8783589712739	7.22262512537243	1.97891662931262	2.37610748550078	3.65897883346442	3.95877069303875	6.0309616029289	5.30088792656269	9.66818442896122	11.1473356663538	0.252377027079017	0.608473712628429	1.44453156858046	1.85132141443463	1.79545162798259	2.30901927239822	3.15982515860965	3.62409054055633	4.34641893333612	4.82669105449985	6.01782400844106	6.49919739633995	7.67105946434041	8.17528726630273	9.59737083266822	10.1396497382524	11.527986055132	12.1226155173413	13.6042157385845	14.2605616460755	15.667539364404	16.3912208217001	17.7875350183932	18.578085574674	5.03257995563588e-15	5.65613157851879e-15	0.0012291402065633	0.00774975924028837	0.0286389160029875	0.0985060349411594	0.0336396840675181	0.194327123637265	0.0421779160140822	0.317420830393545	0.0573424650273679
HC296ST	0	0	3.69617231956729	3.92267736082185	8.29688699093726	7.40706935215741	2.16105533185609	2.58863339419084	3.90943315780566	3.63342340669949	5.16542739368056	4.66464679930807	11.1122051350406	11.2382698547681	0.25581940812663	0.596798846576504	1.49616102249399	1.87845691510741	1.90389177065857	2.38338428773466	3.3331024012387	3.72964402193783	4.57655397015749	4.94337769934796	6.27754288401347	6.59347414647118	7.95434847387756	8.25142358069795	9.90470984660285	10.1914594219918	11.8784951418313	12.1729709158758	14.0159493139844	14.321555132758	16.1625098155382	16.4844101840004	18.3780368973725	18.7153090365666	5.41533369831054e-15	5.99923349168101e-15	0.00170551966369277	0.00890068145538375	0.0381101602186822	0.0990059610268111	0.0399669192668467	0.1869103332269	0.0489860806910149	0.30098010482905	0.0656504424315007
HC297ST	0	0	2.56189079450102	2.66490581941003	4.96789087407486	5.70427912728601	1.55346880927445	2.35803062848774	3.1824775318659	3.72700273781099	3.66872055781089	4.13159522973378	17.5478442745152	17.576646312541	0.2833984869794	0.74739863321649	1.55481624596379	2.08510117708209	2.14381468804053	2.85501704855094	3.69287488379146	4.44387205200471	5.15850872361677	5.99851858719057	7.06794894777151	7.94737082764782	8.99598249963639	9.8989419933487	11.1419755793848	12.0218259015755	13.2859396877428	14.1216875181878	15.5168713423345	16.2817069114107	17.7189345041239	18.3938104954811	19.9256332328959	20.4848125860193	5.29082662533255e-15	4.3199418498654e-15	0.00340038163327464	0.00765988089911708	0.03831485750531	0.195394893801305	0.0415391237244041	0.301327003239205	0.0521141951637061	0.423960644086202	0.0714500522564712
HC303ST	0	0	2.81405690292596	3.86387067877391	4.78889730651763	5.54163078487755	1.51420686928134	2.77273607798289	2.87937920991869	3.0433768858859	3.41958048911797	3.48936602036229	10.9478444445635	11.1882196526319	0.250987245167135	0.860059111469151	1.38163491542443	1.91364549259946	1.85297300400596	2.36365569279517	3.21833467655552	3.50124276791285	4.49750348509646	4.64382137418096	6.20183050289703	6.20902443675511	7.91989885234577	7.81289841577014	9.84903652134643	9.64462066029805	11.7664328497857	11.491333479061	13.7610122888726	13.4331876706924	15.7052417855603	15.3408105066205	17.6431411036493	17.2546134217684	4.76034406743969e-15	3.82921918046341e-15	0.00178031110306475	0.0080160395616535	0.0289613261383761	0.403261719024908	0.0327047109659149	0.513332153291556	0.0423584064576393	0.612009528067883	0.0590197577358771
HC304ST	0	0	2.56287991842939	3.45081745958881	6.75118431000729	8.57538525100658	1.51915746216086	3.21478599420248	4.0350447909149	5.93518914851462	4.6451198736948	6.9633250548433	9.07234567692323	9.67658692159596	0.248588979904422	0.999602528901335	1.37195392178421	2.5981933725493	1.91204376377812	3.72620536932933	3.30525485184287	5.36845294290283	4.59900540027542	6.8497392260849	6.23939981822547	8.47875545592918	7.84496238630022	10.0361071581535	9.6160485985787	11.6890823061585	11.3546415484418	13.2920051842481	13.1638398580452	14.9341979826677	14.926039672079	16.5267482786993	16.6989271914442	18.1252070731937	5.88708839775464e-15	3.05466017637139e-15	0.00179378433271799	0.00604688779009853	0.0398550801170214	0.308956906308259	0.0439313573591643	0.419754420196003	0.0511259874472321	0.569530719818743	0.0667326507923517
HC305ST	0	0	1.72795422179178	2.34621102797777	4.45626348442858	4.71596678551922	1.25585604426323	2.14460559158997	2.05511949606055	2.30095993944348	2.27085018772509	2.54516260075965	7.47197119179438	7.55952481391253	0.196482316784582	0.636841929173469	1.01549090149949	1.42527780947953	1.1953320557128	1.61681101026725	2.02403828032505	2.33200635164314	2.68754285280789	2.96008114653941	3.71639923411941	3.9439407738008	4.72716596689472	4.92784306391047	5.96505744850262	6.13927811791826	7.21449479036801	7.36513253859531	8.60331959831509	8.73089086101375	10.0000659764825	10.1064447044318	11.4756019162659	11.5640735169328	4.61821209513793e-15	5.16331808962007e-15	0.00234709927885359	0.00602695098646922	0.0203962928745272	0.288149817487447	0.0254278445069142	0.358629150536372	0.036070412213163	0.435675279002821	0.055223445300272
HC308ST	0	0	2.35527821192988	3.00189749856692	5.19877772809019	5.39785900107599	1.55653833842282	2.30868414315318	2.13820712181739	2.95288238269892	3.34417946539409	3.60738770320988	13.4185617617309	13.3784107897065	0.243630632237391	0.648548497620639	1.32725979864795	1.77315139939223	1.68744543351964	2.1736051718651	2.89097468896723	3.21595240617208	3.9426604472497	4.1614666524713	5.42194877358473	5.55527502202054	6.91881759030313	7.01198440149378	8.67838386233698	8.75618760699901	10.4816638348297	10.5589016353012	12.4356156620662	12.522756208939	14.4098241926413	14.5130521118343	16.4478620646289	16.5677904697385	5.41533369831054e-15	3.99948899445401e-15	0.00267610398794883	0.00883623622623763	0.0256570270427443	0.135186676306397	0.0324209313696568	0.23209705669021	0.0445862755379003	0.358000716074877	0.0656863337030508
HC312ST	0	0	1.73041151053129	2.2735609388495	6.2906799269254	5.51004736249865	1.13455496427702	1.73228858084229	3.16852736461174	3.06719356722832	3.4174513114458	3.09374155797598	11.5438289945213	11.4548031537452	0.217046003548399	0.603899609580732	1.24360607608393	1.58250246609625	1.63655454117761	1.98615716858035	2.86937766631641	3.06311322439738	4.00332666954839	4.10716291295836	5.52712904441251	5.53725699310652	7.05716876848419	6.99805178209525	8.79189923327132	8.66075718985686	10.5299403370703	10.3364413252054	12.3637129705887	12.1101549788631	14.1779268101741	13.8704801745597	16.0164690069037	15.6575418584521	5.65613157851879e-15	4.76034406743969e-15	0.00203007201508064	0.00660962799508396	0.0406308268632063	0.160629764867017	0.0424470809142375	0.253406679000641	0.0480371947160812	0.359448396701429	0.0605207472156465
HC313ST	0	0	2.32738163239513	3.08694788345537	4.92106414022176	5.84379786989755	1.530923039363	2.45420307919725	3.25921506882828	4.04441086197036	3.74836790298881	4.71264814919426	9.68768173034089	9.51217284331509	0.208649530746344	0.714611456904023	1.24638091616651	1.83427750805096	1.56019938199236	2.33218453655578	2.7716334094799	3.44699482436785	3.84479428220613	4.50546830818541	5.32977190781952	5.95023752851435	6.79692544369658	7.4082404764905	8.48891431663004	9.06598672854957	10.1836287751906	10.7220302994379	12.0024028701844	12.4745290088952	13.8141780611137	14.2108307389023	15.6774418233996	15.9854338569177	3.46365907135345e-15	4.89835363414465e-15	0.00285886675926436	0.00947176170771924	0.0241584725882143	0.162040030680998	0.0276594080972895	0.272293592374656	0.0347918586464014	0.408051218135339	0.0470951937511854
[truncated: 1,193 more columns]
